RESEARCH ARTICLE

# A Novel Zn<sub>2</sub>-Cys<sub>6</sub> Transcription Factor AtrR Plays a Key Role in an Azole Resistance Mechanism of *Aspergillus fumigatus* by Co-regulating *cyp51A* and *cdr1B* Expressions

Daisuke Hagiwara<sup>1</sup>\*, Daisuke Miura<sup>2</sup>®, Kiminori Shimizu<sup>1</sup>, Sanjoy Paul<sup>3</sup>, Ayumi Ohba<sup>2</sup>, Tohru Gono<sup>1</sup>, Akira Watanabe<sup>1</sup>, Katsuhiko Kamei<sup>1</sup>, Takahiro Shintani<sup>2</sup>, W. Scott Moye-Rowley<sup>3</sup>, Susumu Kawamoto<sup>1</sup>, Katsuya Gomi<sup>2</sup>\*

**1** Medical Mycology Research Center, Chiba University, Chiba, Japan, **2** Department of Bioindustrial Informatics and Genomics, Graduate School of Agricultural Science, Tohoku University, Sendai, Japan, **3** Department of Molecular Physiology and Biophysics, Carver College of Medicine, University of Iowa, Iowa City, Iowa, United States of America

\* These authors contributed equally to this work.  
\* dhagi@chiba-u.jp (DH); gomi@biochem.tohoku.ac.jp (KG)

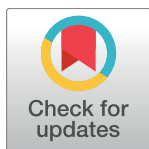

OPEN ACCESS

**Citation:** Hagiwara D, Miura D, Shimizu K, Paul S, Ohba A, Gono T, et al. (2017) A Novel Zn<sub>2</sub>-Cys<sub>6</sub> Transcription Factor AtrR Plays a Key Role in an Azole Resistance Mechanism of *Aspergillus fumigatus* by Co-regulating *cyp51A* and *cdr1B* Expressions. PLoS Pathog 13(1): e1006096. doi:10.1371/journal.ppat.1006096

**Editor:** Robert A. Cramer, Geisel School of Medicine at Dartmouth, UNITED STATES

**Received:** May 18, 2016

**Accepted:** November 28, 2016

**Published:** January 4, 2017

**Copyright:** © 2017 Hagiwara et al. This is an open access article distributed under the terms of the [Creative Commons Attribution License](https://creativecommons.org/licenses/by/4.0/), which permits unrestricted use, distribution, and reproduction in any medium, provided the original author and source are credited.

**Data Availability Statement:** All sequence read files are available from the DDBJ Sequence Read Archive (<http://trace.ddbj.nig.ac.jp/dra/index.html>) database (accession number PRJDB5273).

**Funding:** This work was supported by Joint Usage/Research Program of Medical Mycology Research Center, Chiba University (12-2, 13-1, 14-1, and 15-2). This work was also supported in part by the Japanese Ministry of Education, Culture, Sports, Science and Technology (MEXT) Special Budget

## Abstract

Successful treatment of aspergillosis caused by *Aspergillus fumigatus* is threatened by an increasing incidence of drug resistance. This situation is further complicated by the finding that strains resistant to azoles, the major antifungal drugs for aspergillosis, have been widely disseminated across the globe. To elucidate mechanisms underlying azole resistance, we identified a novel transcription factor that is required for normal azole resistance in *Aspergillus* fungi including *A. fumigatus*, *Aspergillus oryzae*, and *Aspergillus nidulans*. This fungal-specific Zn<sub>2</sub>-Cys<sub>6</sub> type transcription factor AtrR was found to regulate expression of the genes related to ergosterol biosynthesis, including *cyp51A* that encodes a target protein of azoles. The *atrR* deletion mutant showed impaired growth under hypoxic conditions and attenuation of virulence in murine infection model for aspergillosis. These results were similar to the phenotypes for a mutant strain lacking *SrbA* that is also a direct regulator for the *cyp51A* gene. Notably, AtrR was responsible for the expression of *cdr1B* that encodes an ABC transporter related to azole resistance, whereas *SrbA* was not involved in the regulation. Chromatin immunoprecipitation assays indicated that AtrR directly bound both the *cyp51A* and *cdr1B* promoters. In the clinically isolated itraconazole resistant strain that harbors a mutant Cyp51A (G54E), deletion of the *atrR* gene resulted in a hypersensitivity to the azole drugs. Together, our results revealed that AtrR plays a pivotal role in a novel azole resistance mechanism by co-regulating the drug target (Cyp51A) and putative drug efflux pump (Cdr1B).

for Research Project: The Project on Controlling Aspergillosis and the Related Emerging Mycoses (KK), a Cooperative Research Grant of NEKKEN (2011-15) (TG), the National BioResource project for Pathogenic Microbes funded by the MEXT, Japan (<http://www.nbrp.jp/>), a Grant-in-Aid for Scientific Research on Priority Areas, Applied Genomics (KAKENHI no. 17019001), from MEXT (KG), and NIH GM49825 and AI113748 (WSMR). The funders had no role in study design, data collection and analysis, decision to publish, or preparation of the manuscript.

**Competing Interests:** The authors have declared that no competing interests exist.

## Author Summary

Better survival of chronically ill patients has produced an increased number of cases involving fungal infectious disease. This is partly due to a larger number of immunocompromised patients. Meanwhile, the catalogue of antifungal drugs remains quite limited and the appearance of resistant isolates is becoming more common. The filamentous fungus *Aspergillus fumigatus* is the main causative pathogen for deep-seated aspergillosis. For this fungus, resistance to azoles, which are the most commonly utilized drug for treatment of aspergillosis, has exhibited an alarming increase linked with elevated mortality. We know relatively little of the molecular details underpinning azole resistance in *A. fumigatus* other than alterations in the target enzyme. Here, we identified and characterized a novel transcription factor AtrR that is required for wild-type azole resistance in this fungus as well as other *Aspergillus* fungi, such as *Aspergillus oryzae* and *Aspergillus nidulans*. We discovered that AtrR co-regulates the target and pump, both of which are essential for azole resistance. More importantly, deletion of the *atrR* gene could sensitize a clinically isolated multi-azole resistant strain and exhibited a virulence defect in a mouse model. This success in overcoming an existing resistance mutation provides a new avenue for the prevention and treatment of aspergillosis.

## Introduction

Aspergillosis is one of the most common infectious diseases by mold, with *Aspergillus fumigatus* being the most frequently causative fungus with high mortality (more than 60%). Despite the importance of this disease, approved antifungals for treatment of aspergillosis are quite limited. Together with difficulties in early diagnosis, today aspergillosis is a major threat especially for immunocompromised patients. Further worsening the outlook for successful antifungal therapy, azole resistant *A. fumigatus* strains have been found with increasing incidence worldwide [1,2]. Azoles are an essential antifungal drug for therapy for chronic aspergillosis. In fact, azole resistant *A. fumigatus* strains exhibit a poor clinical outcome [3]. Therefore it is an urgent issue to unravel the molecular mechanisms underlying azole resistance and to develop new antifungal drugs or agents that are able to reverse azole resistance.

Mutations in the *cyp51A* gene locus have been frequently reported in azole resistant *A. fumigatus* strains. This locus encodes lanosterol- $\alpha$ -14-demethylase, the target enzyme of azole drugs [1,3]. Inhibition of the Cyp51A enzyme results in a significant change in sterol profile in *A. fumigatus* cells, where ergosterol deficiency as well as accumulation of toxic intermediates is thought to cause the antifungal effect [4,5]. Several reports have revealed that G54 and M220 are hot spots for azole resistance mutations in the Cyp51A protein [6]. Resistant mutations tend to arise during prolonged treatment of chronic aspergillosis with azole drugs [3,7,8]. In addition to resistance acquired during therapy, environmentally-derived resistance mutations have emerged as a major source of resistant organisms. Azole resistant strains with a combination of a tandem repeat in the promoter region of *cyp51A* and amino acid mutation(s) (TR34/L98H and TR46/Y121F/T289A) have been isolated from patients regardless of azole therapy history [9–11]. This pre-acquired azole resistant strain limits the alternatives for effective drug therapy of aspergillosis. Recently emerging mutations were described worldwide and range across isolates from Europe [10–13], Asia [14–16], and North America [17].

To date, one surveillance report provided data that azole resistant strains were up to 38% of the isolates from aspergillosis patients in the Netherlands, about 90% of which are related

to Cyp51A [18]. Apart from alterations in *cyp51A*, a mutation in *hapE* [19] and overexpression of *cdr1B* [20] or *cyp51B* [21] were reported to be responsible for azole resistance in a clinical setting. Importantly, *cdr1B* encodes an ATP-binding cassette (ABC) transporter sharing high sequence similarity with *Saccharomyces cerevisiae* Pdr15 and Pdr5, *Candida albicans* Cdr4 and Cdr1, and *Candida glabrata* Cdr1 and Pdh1. This shared homology is suggestive of a role of Cdr1B in drug efflux. The fact that deletion of the *cdr1B* resulted in azole sensitive phenotype further supported the important role in azole resistance in *A. fumigatus* [20,22].

The transcription factors involved in azole resistance in fungi have been intensively investigated in *S. cerevisiae*. The well-studied Pdr1 and its paralog, Pdr3, are zinc finger transcription factors that regulate the pleiotropic drug response in the yeast [23]. Pdr1 and Pdr3 serve as transcriptional activators and repressors by binding to pleiotropic drug response elements (PDREs) that are found in the promoter regions of target genes [24]. The targets include the ABC transporters encoded by *PDR5*, *PDR10*, and *PDR15* [25].

In filamentous fungi including plant and animal pathogens, only one regulatory protein involved in azole resistance has been studied. This protein was designated SrbA and encodes a homologue of the Sterol Regulatory Element-Binding Proteins (SREBPs). The SREBP is a transcription factor with a basic Helix-Loop-Helix (bHLH) DNA-binding domain and is well conserved in mammalian cells, where it regulates cholesterol synthesis and uptake [26]. Roles of the *A. fumigatus* SREBP, SrbA, were recently demonstrated [27,28]. SrbA was shown to regulate expression of multiple genes related to ergosterol biosynthesis pathway, including *erg3*, *erg24A*, and *erg25A*. A mutant strain defective in *srbA* showed hypersensitivity to azoles. Further experiments revealed that SrbA exerts a direct regulation on these genes, suggesting that this factor is a central regulator of ergosterol biosynthesis in the fungus [29,30]. Importantly, the *srbA* mutant was unable to grow under hypoxic condition. This is because SREBPs sense sterol level in the cells as an indirect indicator of oxygen. The *srbA* mutant was unable to adapt to hypoxic conditions that the fungi are thought to encounter at infection sites. This inability of the mutant to grow under hypoxia is also thought to lead to a strong attenuation in virulence in a mouse infection model. Whereas *Candida* species have no obvious SREBP orthologs, *Cryptococcus neoformans* has a SREBP, Sre1, which is also involved in azole sensitivity, hypoxia growth, and virulence [31,32]. These findings highlighted that ergosterol biosynthesis is crucial for not only drug resistance but also for adaptation to hypoxia and virulence. Besides SREBPs, however, current knowledge about the transcription factors responsible for azole resistance and sterol biosynthesis is limited particularly in pathogenic fungi.

In the present study, we identified a novel transcription factor involved in azole resistance mechanism in *Aspergillus* fungi. From a genetic screen in *Aspergillus oryzae* designed to identify transcriptional regulators of azole drug resistance, we found a novel Gal4-type Zn<sub>2</sub>-Cys<sub>6</sub> zinc finger domain-containing transcription factor designated AtrR. Deletion of the *atrR* gene in *A. oryzae* and *Aspergillus nidulans* resulted in hypersensitivity to azole drugs. Similarly, deletion of the *atrR* gene in *A. fumigatus* resulted in hypersensitivity to azole antifungals, inability to grow under hypoxic conditions, attenuated virulence, and decreased expression of *cyp51A* as well as the ABC transporter-encoding gene *cdr1B*. Even in a clinical azole resistant strain (*cyp51A* G54E), deletion of *atrR* led to an azole-hypersensitive phenotype. All our data indicate that AtrR plays an essential role in azole resistance in *A. fumigatus*. Importantly, this is the first identification of a regulatory protein coordinating expression of not only an azole drug target (Cyp51A) but also for the putative drug efflux transporter (Cdr1B).

## Results

### Identification of *Aspergillus oryzae* AtrR transcription factor responsible for azole resistance

To identify the transcription factors (TFs) responsible for azole resistance in filamentous fungi, we utilized a transcription factor-overexpressing library of *Aspergillus oryzae* that was previously constructed in the Noda Institute for Scientific Research [33]. First, we searched for *A. oryzae* transcription factors with a DNA-binding domain related to *S. cerevisiae* Pdr1 and Pdr3, resulting in 5 candidate proteins (designated TF1 to TF5) (S1A Fig). To evaluate a role of these TFs in azole resistance, strains overexpressing each TF were tested for growth in the presence of azoles. Only *A. oryzae* strain expressing TF3 showed a significant hyper-resistance to clotrimazole (Fig 1A). TF3 corresponds to AO090026000614 which is a protein with 894 amino acids containing two characteristic motifs designated as GAL4-like Zn(II)<sub>2</sub>/Cys<sub>6</sub> binuclear cluster DNA-binding domains (IPR001138) and a fungal specific transcription factor domain (IPR007219) (S1B Fig). Based on the screening design to find transcription factors homologous to ScPdr1 and/or ScPdr3 that regulate ABC transporter gene expression, we named this novel TF AoAtrR (*A. oryzae* ABC-transporter regulating transcription factor). To further characterize the role of AoAtrR, the corresponding gene was deleted in *A. oryzae* host strain (RIB40) (S2A and S2B Fig), and azole resistance was examined. The *AoatrR* mutant showed hyper-sensitivity in the presence of 0.01 µg/mL miconazole, whereas the host strain was able to grow under this condition (Fig 1B). These results indicated that AoAtrR is involved in azole resistance in *A. oryzae*. The closely related species *Aspergillus nidulans* has an orthologous protein (designated AnAtrR; amino acids sequence identity: 79.9%) (S1B Fig), and the *AnatrR* deletion mutant strain (S2C and S2D Fig) also clearly exhibited azole sensitive phenotype (Fig 1C). As a result, the AtrR-family protein appears to be a novel TF responsible for azole resistance mechanisms in *Aspergillus* species. This AtrR-family TF is widely conserved in filamentous fungi including important plant pathogenic fungi (*Fusarium graminearum*, *Magnaporthe oryzae*, and *Collectotrichum orbiculare*) and human pathogenic fungi (*Aspergillus fumigatus*, *Ajellomyces dermatitidis*, and *Coccidioides immitis*) (Fig 1D).

### AtrR is involved in azole resistance of *A. fumigatus*

To expand our understanding of molecular mechanism underlying azole resistance with clinically important fungi, we searched for an AtrR homologue in the human pathogenic fungus *A. fumigatus*. The AfAtrR in *A. fumigatus* (hereafter, designated AtrR to simplify descriptions) is homologous to AoAtrR and AnAtrR, and the deletion mutant and the complementing strains (designated  $\Delta atrR$  and *Co-atrR*) were constructed in the *A. fumigatus* host strain (Af293) (S3 Fig). A disc-diffusion assay revealed that  $\Delta atrR$  was hypersensitive to fluconazole and miconazole, whereas the mutant showed no distinguishable sensitivity to amphotericin B and micafungin (Fig 2A). In addition to the medical azoles,  $\Delta atrR$  showed hypersensitivity to widely used azole fungicides, bromuconazole, tebuconazole, difenoconazole, and propiconazole (S4 Fig). Growth inhibition assay with varied concentrations of drugs in plate media indicated that  $\Delta atrR$  was highly susceptible to itraconazole and miconazole (Fig 2B). The complemented strain showed comparable drug sensitivity to the WT, indicating that these phenotypes were caused by deletion of the *atrR* gene.

### AtrR regulates *cyp51A* expression

We assumed that hypersensitivity to azoles in  $\Delta atrR$  was associated with a defect in expression of the target protein Cyp51A. In fact, the expression level of *cyp51A* gene was quite low



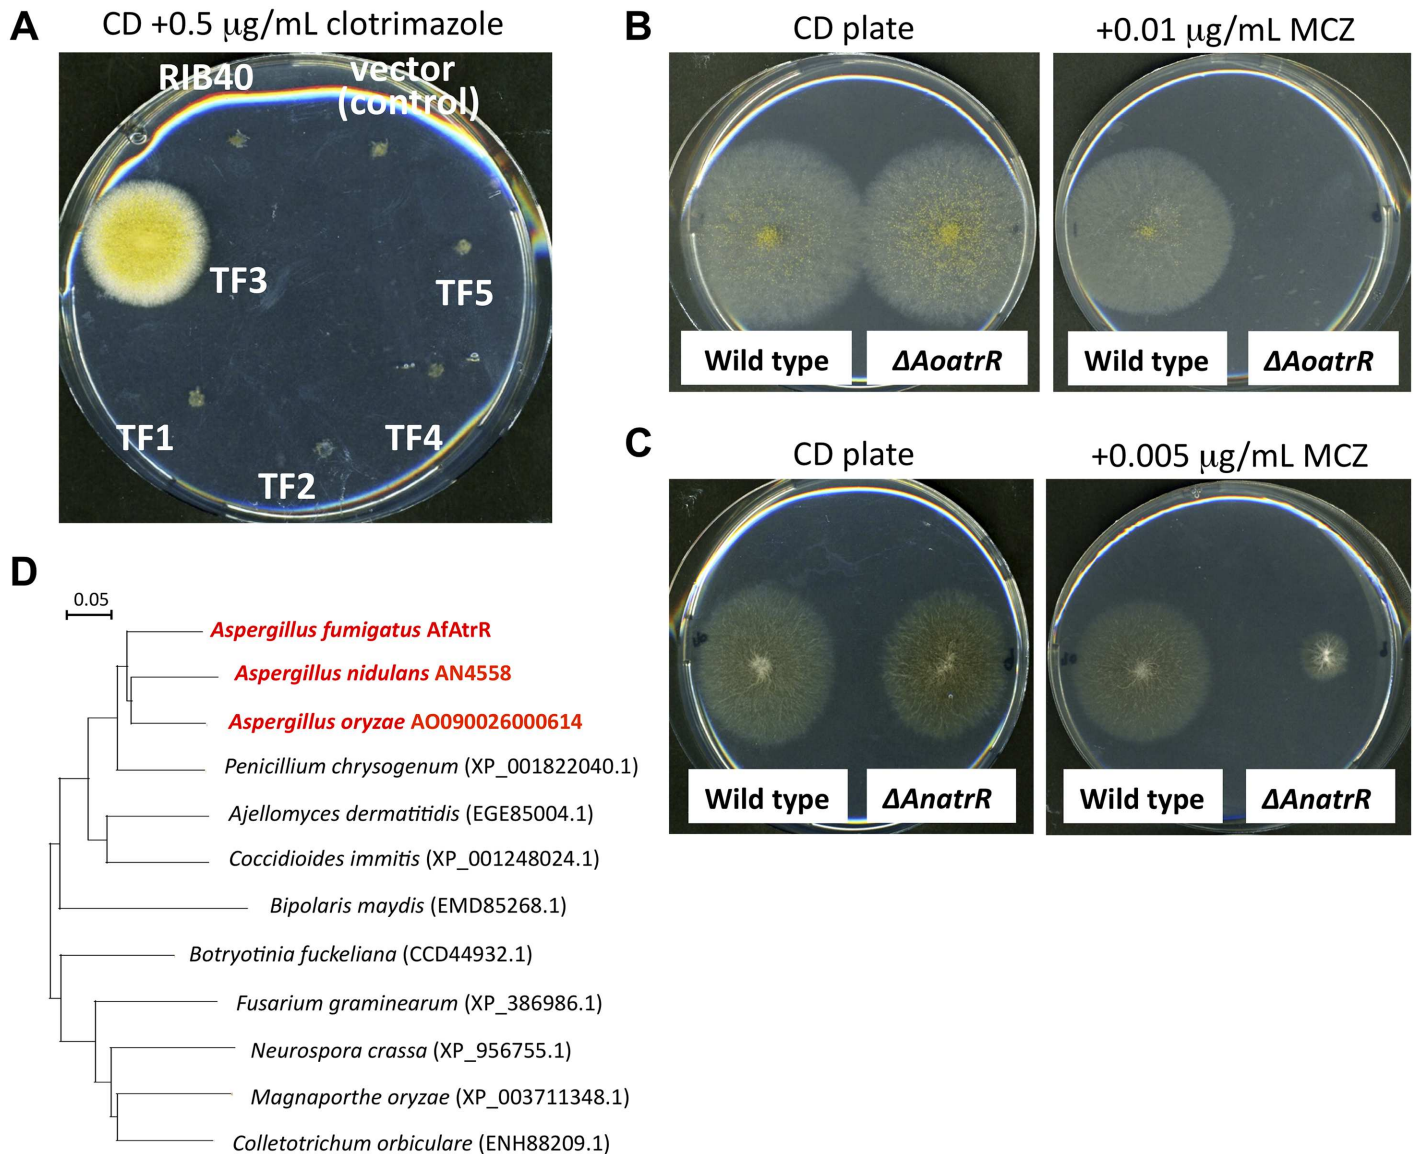

**Fig 1. Identification of AtrR-family genes in *A. oryzae* and *A. nidulans*.** (A) Growth of *A. oryzae* strains overexpressing the candidate genes on medium plate in the presence of clotrimazole.  $10^2$  conidia of the strains were inoculated on CD plate (1% maltose) containing 0.5 µg/ml clotrimazole and incubate at 30°C for 7 days. (B) Growth of the *AotrR* deletion strain on medium plate in the presence of miconazole.  $10^2$  conidia of *A. oryzae* LigD (wild type) and the *AotrR* deletion mutant ( $\Delta AotrR$ ) were inoculated on CD plate (1% glucose) containing 0.01 µg/ml miconazole (MCZ) and incubate at 30°C for 5 days. (C) Growth of the *AnatrR* deletion strain on medium plate in the presence of MCZ.  $10^2$  conidia of *A. nidulans* KU70 (wild type) and the *AnatrR* deletion mutant ( $\Delta AnatrR$ ) were inoculated on CD plate (1% glucose) containing 0.005 µg/ml miconazole and incubate at 37°C for 5 days. (D) Phylogenetic tree of fungal AtrR ortholog proteins. The protein sequences were retrieved from NCBI database, and the sequence IDs were shown in brackets. The sequences were aligned by Clustal W program and the distances were calculated. The phylogenetic tree was drawn with an NJplot program.

doi:10.1371/journal.ppat.1006096.g001

in the  $\Delta atrR$  strain (less than 5% of that in the WT), whereas *cyp51B* expression was also reduced (approximately 50% of the WT) (Fig 3A). Since *SrbA* was previously characterized to regulate *cyp51A* [29], we also constructed a null mutant of *srbA* and compared the two mutants ( $\Delta atrR$  and  $\Delta srbA$ ) for their relative effects on *cyp51A* and *cyp51B* expression levels. We found that the expression levels of *cyp51A* and *cyp51B* were largely comparable between  $\Delta srbA$  and  $\Delta atrR$  (Fig 3A). Although not large, there was a slight increase in expression level for *srbA* in  $\Delta atrR$  mutant and a slight decrease in *atrR* expression in  $\Delta srbA$ , suggesting

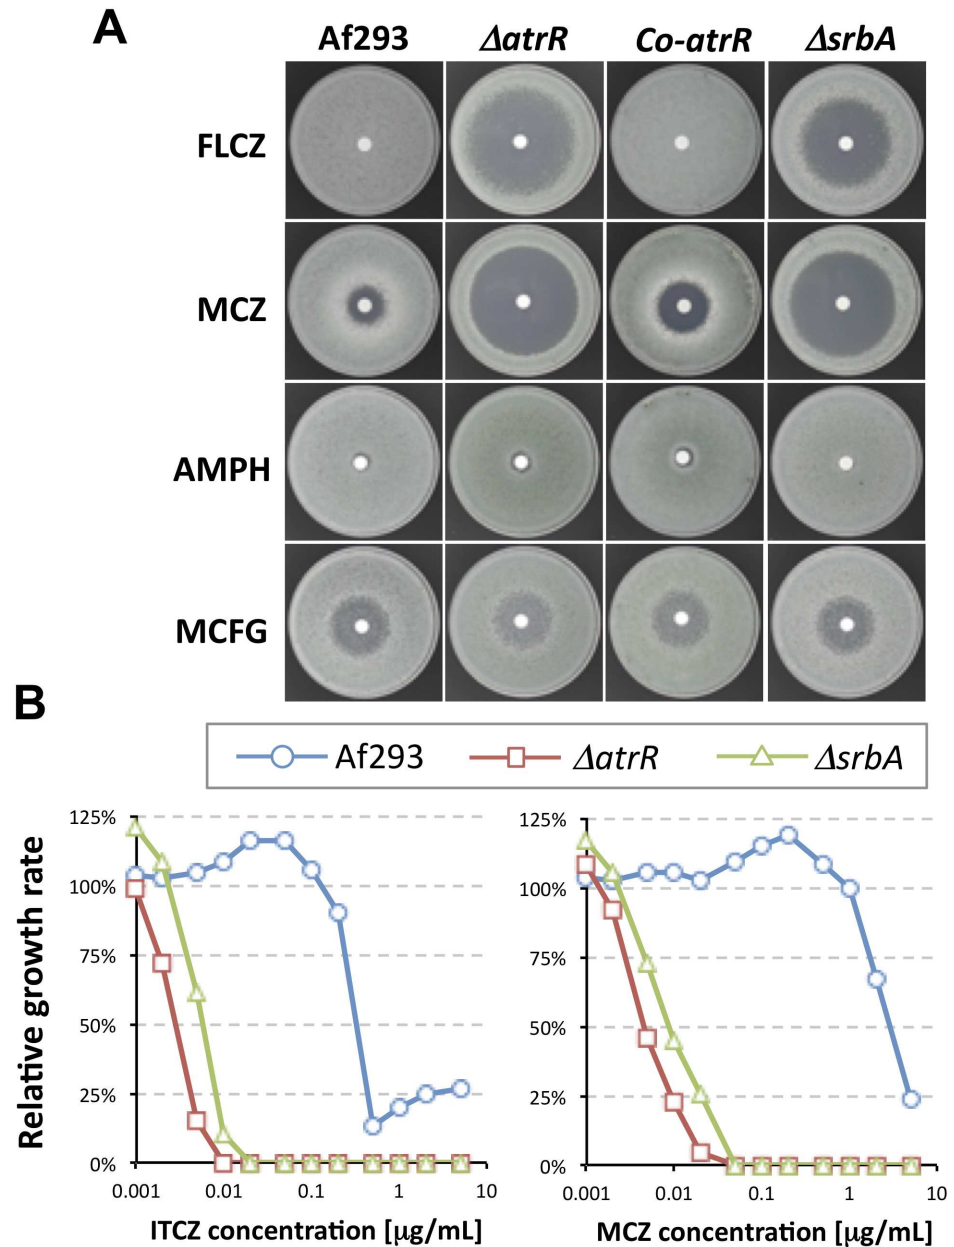

**Fig 2. Drug susceptibility of *A. fumigatus* strains linked to modifications of the *atrR* and *srbA* genes.** (A) Antifungal drug susceptibility test by paper-disc diffusion assay. GMM plates containing conidia of each strain were prepared. A paper-disc was placed on center of the plate, and 10  $\mu\text{l}$  of drug solution indicated was dropped on it (fluconazole (FLCZ): 10 mg/mL; MCZ: 10 mg/mL; amphotericin B (AMPH): 0.25 mg/mL; micafungin (MCFG): 0.02 mg/mL). The plates were incubated for 48 h before photographed. (B) Inhibition test for colony growth by antifungal drugs. The conidia of each strain were center-inoculated onto GMM plates containing indicated concentrations of itraconazole (ITCZ) or MCZ. The plates were incubated for 70 h. The colony diameter was measured in triplicates, and the mean values for plates with drugs were compared with those without drugs. The percentage of growth was plotted in the graphs.

doi:10.1371/journal.ppat.1006096.g002

effects of *AtrR* and *SrbA* on each other's mRNA expression (Fig 3A). To determine if the heterologous expression of *cyp51A* was sufficient to restore azole resistance in mutants lacking either *atrR* or *srbA*, we introduced an ectopic *cyp51A* gene regulated by the *thiA* promoter (*PthiA-cyp51A*) into the  $\Delta atrR$  and  $\Delta srbA$  backgrounds. When the *thiA* promoter was

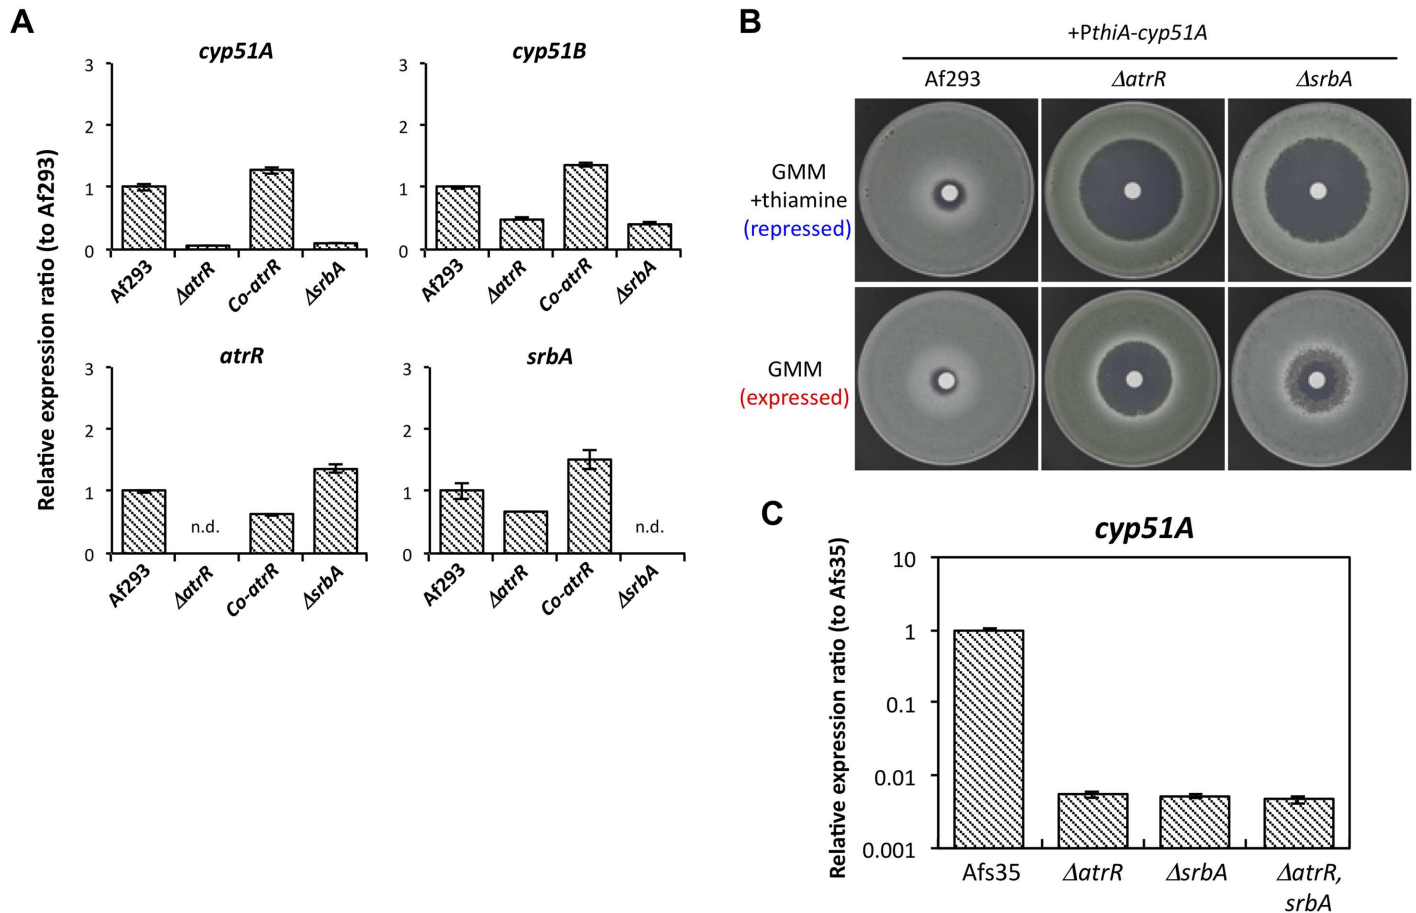

**Fig 3. Expression analysis in *atrR* and *srbA* deletion mutants.** (A) Expression levels of the *cyp51A* and *cyp51B* as well as the *atrR* and *srbA* genes were determined by real-time RT-PCR method. The strains were cultivated in GMM for 24 h. The expression levels of gene of interest were normalized with that of actin gene. Relative expression ratios against Af293 (WT) are shown. Error bars represent the standard deviations based on three independent replicates. (B) MCZ susceptibility test for the Af293,  $\Delta atrR$ , and  $\Delta srbA$  strains carrying a *cyp51A* gene fused with a *thiA* promoter. MCZ susceptibility was examined as described above. When thiamine was present, expression of the functional *cyp51A* mRNA driven by *thiA* promoter was repressed. The plates were incubated for 48 h before photographed. (C) Expression levels of *cyp51A* were determined by real-time RT-PCR in the mutant strains of  $\Delta atrR$ ,  $\Delta srbA$ ,  $\Delta atrR \Delta srbA$  of Afs35-background. The strains were cultivated in YGMM for 18 h.

doi:10.1371/journal.ppat.1006096.g003

maximally active (absence of thiamine), the resulting expression level of Cyp51A was able to partially suppress loss of either transcription factor gene in both strains.  $\Delta atrR$ +*PthiA-cyp51A* and  $\Delta srbA$ +*PthiA-cyp51A* showed smaller inhibition halos against miconazole compared to those under the repressed condition (presence of thiamine) (Fig 3B). This suggested that azole susceptibility in  $\Delta atrR$  and  $\Delta srbA$  are partly a result of decreased *cyp51A* expression.

Hypersensitivities to fluconazole, miconazole, and itraconazole were also seen in the  $\Delta srbA$  strain (Fig 2A and 2B). The  $\Delta atrR$  strain was slightly more sensitive to fluconazole and itraconazole compared to a mutant lacking the *srbA* gene. However, both of these factors are required for normal azole resistance in *A. fumigatus*. In order to confirm the relative role of these genes across strains, these mutations were produced in a different genetic background (Afs35). The double  $\Delta atrR \Delta srbA$  mutation was also produced in this same strain. The expression level of *cyp51A* was comparable between the  $\Delta atrR$ ,  $\Delta srbA$ , as well as  $\Delta atrR \Delta srbA$ , supporting the required function of both AtrR and SrBA (Fig 3C).

## AtrR regulates genes related to ergosterol biosynthesis

To globally identify the genes responsive to AtrR, we performed transcriptome analysis using RNA-sequencing. Compared to the WT, 13 and 53 genes were up-regulated and down-regulated, respectively, in the  $\Delta atrR$  strain, showing AtrR-dependent genes. We also determined SrbA-dependent genes in a similar fashion, resulting in 21 up-regulated genes and 51 down-regulated genes. Comparing each group of up- and down-regulated genes between the  $\Delta atrR$  and  $\Delta srbA$  strains, we found that 9 genes were commonly negatively regulated by AtrR and SrbA whereas 18 genes were positively regulated (Fig 4A, Table 1, S1 and S2 Tables). This comparative transcriptome analysis revealed that AtrR and SrbA were required for the expression of *erg3B*, *erg24A*, and *erg25A* as well as *cyp51A* genes, all of which are related to ergosterol biosynthesis. Interestingly, the other genes related to ergosterol biosynthesis were only modestly affected by deletion of either *atrR* or *srbA* genes (Fig 4B). Involvement of AtrR and SrbA in the transcriptional regulation of the *erg3B*, *erg24A*, *erg25A*, and *cyp51A* genes was further verified by real-time RT PCR analysis (Fig 4C). As a previous report demonstrated that SrbA regulates genes related to the ergosterol biosynthesis pathway [30], our data indicate that AtrR also functions in regulating this pathway.

## AtrR is necessary for hypoxia adaptation and virulence

As both AtrR and SrbA have a role in transcriptional regulation of the ergosterol biosynthesis pathway, we wanted to assess if AtrR also contributed to hypoxic growth and virulence as previously shown for SrbA [27,28]. We tested growth under hypoxic conditions and found that growth of both  $\Delta atrR$  and  $\Delta srbA$  mutants, constructed in either the Af293 or Afs35 genetic backgrounds, was strongly inhibited under this condition (Fig 5A and 5B). These results indicate a crucial role for AtrR in adaptation to hypoxia. To confirm the participation of AtrR in the hypoxic response, the transcriptional regulation of *erg3B*, *erg24A*, *erg25A*, and *cyp51A* upon oxygen limitation (1 h) was compared in  $\Delta atrR$  and  $\Delta srbA$  strains. The induction of these genes upon oxygen limitation was diminished or eliminated in the both mutants (Fig 5C). These results indicated that AtrR also plays an important role in hypoxia adaptation in *A. fumigatus* physiology as found for SrbA.

We also examined the role of AtrR in pathogenesis using a murine infection model. In this model for aspergillosis, virulence of the  $\Delta atrR$  strain was significantly reduced compared to the WT and *Co-atrR* strains (Fig 6A). The reduction in virulence was also seen in the Afs35-background  $\Delta atrR$  as well as  $\Delta srbA$  and  $\Delta atrR \Delta srbA$  (Fig 6B). These results indicated that AtrR was required for full pathogenicity of *A. fumigatus*. This is again reminiscent of the role of SrbA in virulence, where  $\Delta srbA$  showed significantly attenuated virulence in immune-compromised mice [27].

## AtrR is a regulator of ABC transporter gene *cdr1B*

To determine the role of AtrR in drug-induced gene expression in the *A. fumigatus* azole response, we performed further RNA-sequencing analysis following azole challenges. WT and  $\Delta atrR$  were cultivated in PDB for 20 h, and then fluconazole (final concentration, 64  $\mu\text{g}/\text{mL}$ ) or miconazole (2  $\mu\text{g}/\text{mL}$ ) were added. After 2 h, the mycelia were harvested, and the transcriptomes were determined by RNA-sequencing. Of 7015 genes that showed >10 reads per kilobase of exon per million mapped reads (RPKM) in WT without drug treatment, 301 genes were reduced to <33% in  $\Delta atrR$  compared to the WT (Fig 7A). Upon fluconazole and miconazole treatment, 56 and 25 genes were upregulated in WT, respectively. Among them, 19 genes were commonly responsive to fluconazole and miconazole, 6 genes of which were dependent on AtrR. The azole-responsive AtrR-dependent genes included *cyp51A*, *erg24A*, *erg24B*,



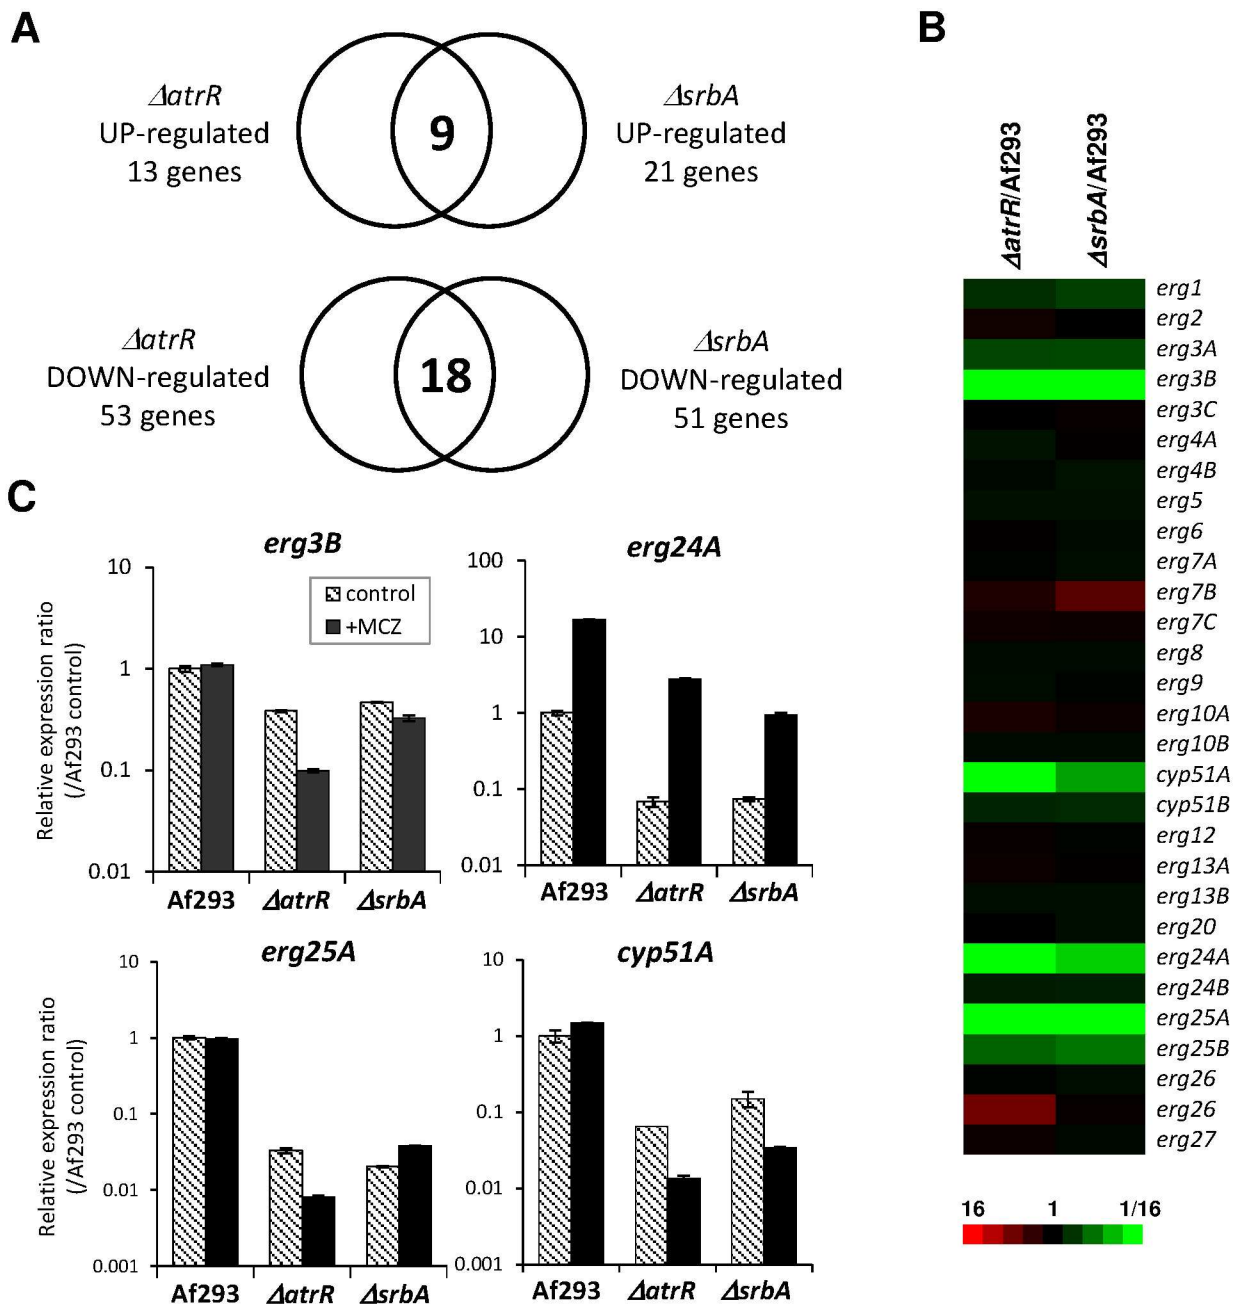

**Fig 4. AtrR and SrbA regulate genes associated with the ergosterol biosynthesis pathway.** (A) The AtrR- and SrbA-dependent genes determined by RNA-sequencing analysis. Numbers of gene with more than 4-fold or less than 1/4-fold change in expression level compared to Af293 are shown. The expression level of nine genes in *ΔatrR* and *ΔsrbA* strains was more than 4-fold of Af293, and the expression level of eighteen genes in *ΔatrR* and *ΔsrbA* strains was less than 1/4-fold of Af293. (B) Heat map of expression of the *erg* genes. The levels of expression ratio were shown. (C) Expression levels of *erg3B*, *erg24A*, *erg25A*, and *cyp51A* genes in response to MCZ addition were determined by real-time RT-PCR method. The strains were cultivated in GMM for 24 h followed by 2 h culture with MCZ (final concentration, 2 μg/mL) or without MCZ (control). The expression levels of gene of interest were normalized with that of actin gene. Relative expression ratios against Af293 (WT without MCZ) are shown. Error bars represent the standard deviations based on three independent replicates.

doi:10.1371/journal.ppat.1006096.g004

**Table 1. RNA-sequencing expression data for the genes regulated by AtrR and SrbA.**

|                                                                      | ID         | Gene name     | RPKM   |               |               | Expression ratio    |                     | Annotation                                                          |
|----------------------------------------------------------------------|------------|---------------|--------|---------------|---------------|---------------------|---------------------|---------------------------------------------------------------------|
|                                                                      |            |               | Af293  | $\Delta atrR$ | $\Delta srbA$ | $\Delta atrR/Af293$ | $\Delta srbA/Af293$ |                                                                     |
| <b>UP in <math>\Delta atrR</math> and <math>\Delta srbA</math></b>   |            |               |        |               |               |                     |                     |                                                                     |
|                                                                      | Afu1g03800 |               | 13.8   | 83.1          | 205.3         | 6.01                | 14.84               | C6 transcription factor, putative                                   |
|                                                                      | Afu2g05060 | <i>aoxA</i>   | 474.7  | 4255.6        | 6685.0        | 8.97                | 14.08               | alternative oxidase AlxA, putative                                  |
|                                                                      | Afu3g03280 |               | 46.7   | 324.7         | 542.2         | 6.95                | 11.60               | FAD binding monooxygenase, putative                                 |
|                                                                      | Afu3g13010 |               | 52.5   | 390.8         | 567.2         | 7.44                | 10.80               | Zn-dependent hydrolase/oxidoreductase family protein, putative      |
|                                                                      | Afu4g09450 |               | 24.0   | 97.0          | 171.1         | 4.04                | 7.13                | hypothetical protein                                                |
|                                                                      | Afu4g14380 |               | 203.2  | 1313.3        | 1894.0        | 6.46                | 9.32                | hypothetical protein                                                |
|                                                                      | Afu5g06070 | <i>mdr1</i>   | 11.9   | 65.9          | 108.2         | 5.53                | 9.09                | ABC multidrug transporter Mdr1                                      |
|                                                                      | Afu7g00950 |               | 10.3   | 60.5          | 77.7          | 5.87                | 7.54                | MFS monosaccharide transporter, putative                            |
|                                                                      | Afu8g01860 |               | 30.6   | 163.0         | 218.8         | 5.32                | 7.15                | hypothetical protein                                                |
| <b>DOWN in <math>\Delta atrR</math> and <math>\Delta srbA</math></b> |            |               |        |               |               |                     |                     |                                                                     |
|                                                                      | Afu1g03150 | <i>erg24A</i> | 25.5   | 1.1           | 2.5           | 0.04                | 0.10                | c-14 sterol reductase                                               |
|                                                                      | Afu2g00320 | <i>erg3B</i>  | 116.8  | 0.4           | 0.8           | 0.00                | 0.01                | sterol delta 5,6-desaturase, putative                               |
|                                                                      | Afu2g00330 |               | 10.5   | 1.5           | 0.6           | 0.15                | 0.06                | beta-alanine synthase, putative                                     |
|                                                                      | Afu2g17660 |               | 11.7   | 1.5           | 0.8           | 0.13                | 0.07                | C4-dicarboxylate transporter/malic acid transport protein, putative |
|                                                                      | Afu3g00810 | <i>hyd1</i>   | 39.7   | 1.2           | 0.0           | 0.03                | 0.00                | cholestenol delta-isomerase, putative                               |
|                                                                      | Afu3g00820 |               | 14.5   | 0.3           | 1.0           | 0.02                | 0.07                | conserved hypothetical protein                                      |
|                                                                      | Afu4g06890 | <i>cyp51A</i> | 261.4  | 14.9          | 40.2          | 0.06                | 0.15                | 14-alpha sterol demethylase Cyp51A                                  |
|                                                                      | Afu5g01248 |               | 24.5   | 0.8           | 0.8           | 0.03                | 0.03                | conserved hypothetical protein                                      |
|                                                                      | Afu5g14740 | <i>fleA</i>   | 91.6   | 9.3           | 6.7           | 0.10                | 0.07                | fucose-specific lectin FleA                                         |
|                                                                      | Afu7g01490 | <i>ptr2</i>   | 149.7  | 23.4          | 27.8          | 0.16                | 0.19                | MFS peptide transporter Ptr2, putative                              |
|                                                                      | Afu704920  |               | 138.3  | 20.1          | 16.6          | 0.15                | 0.12                | hypothetical protein                                                |
|                                                                      | Afu7g04930 | <i>pr1</i>    | 26.7   | 0.7           | 2.2           | 0.03                | 0.08                | alkaline serine protease (PR1)/allergen F18-like                    |
|                                                                      | Afu7g06981 |               | 13.0   | 1.5           | 2.5           | 0.12                | 0.19                | conserved hypothetical protein                                      |
|                                                                      | Afu8g00830 |               | 135.7  | 13.2          | 23.9          | 0.10                | 0.18                | conserved hypothetical protein                                      |
|                                                                      | Afu8g01330 |               | 10.2   | 0.6           | 1.8           | 0.06                | 0.18                | hypothetical protein                                                |
|                                                                      | Afu8g02440 | <i>erg25A</i> | 1345.1 | 84.5          | 40.5          | 0.06                | 0.03                | C-4 methyl sterol oxidase, putative                                 |
|                                                                      | Afu8g06000 |               | 18.2   | 4.3           | 4.3           | 0.24                | 0.24                | FMN dependent dehydrogenase, putative                               |
|                                                                      | Afu8g06010 |               | 36.8   | 6.4           | 8.8           | 0.17                | 0.24                | C6 transcription factor, putative                                   |

doi:10.1371/journal.ppat.1006096.t001

*erg25A* as well as *hyd1* and Afu3g00820. These results again confirmed that AtrR regulated multiple genes related to the ergosterol biosynthesis pathway (Table 2). While *atrR* and *srbA* expression was slightly affected in response to fluconazole (1.22- and 1.62-fold, respectively) and miconazole (1.27- and 1.37-fold) treatment, real-time RT-PCR analysis suggested that the effect of azoles on the expressions were only subtle (Fig 7B).

By comparing amino acid sequences, *A. fumigatus* was found to possess 12 PDR-type ABC transporters. Among them, *cdr1B* expression was highest in WT according to the transcriptome data, whereas the expression level was reduced to less than 10% in the  $\Delta atrR$  strain (Table 2). On the contrary, expressions of some transporter genes (i.e. Afu3g01400 and AtrI) were slightly higher in the  $\Delta atrR$  compared to the WT, which suggests a negative role for AtrR. We then verified the expression profiles for the *cdr1B* by real-time RT PCR analysis, showing that the basal *cdr1B* expression was reduced in the  $\Delta atrR$  strain (approximately 25% relative to

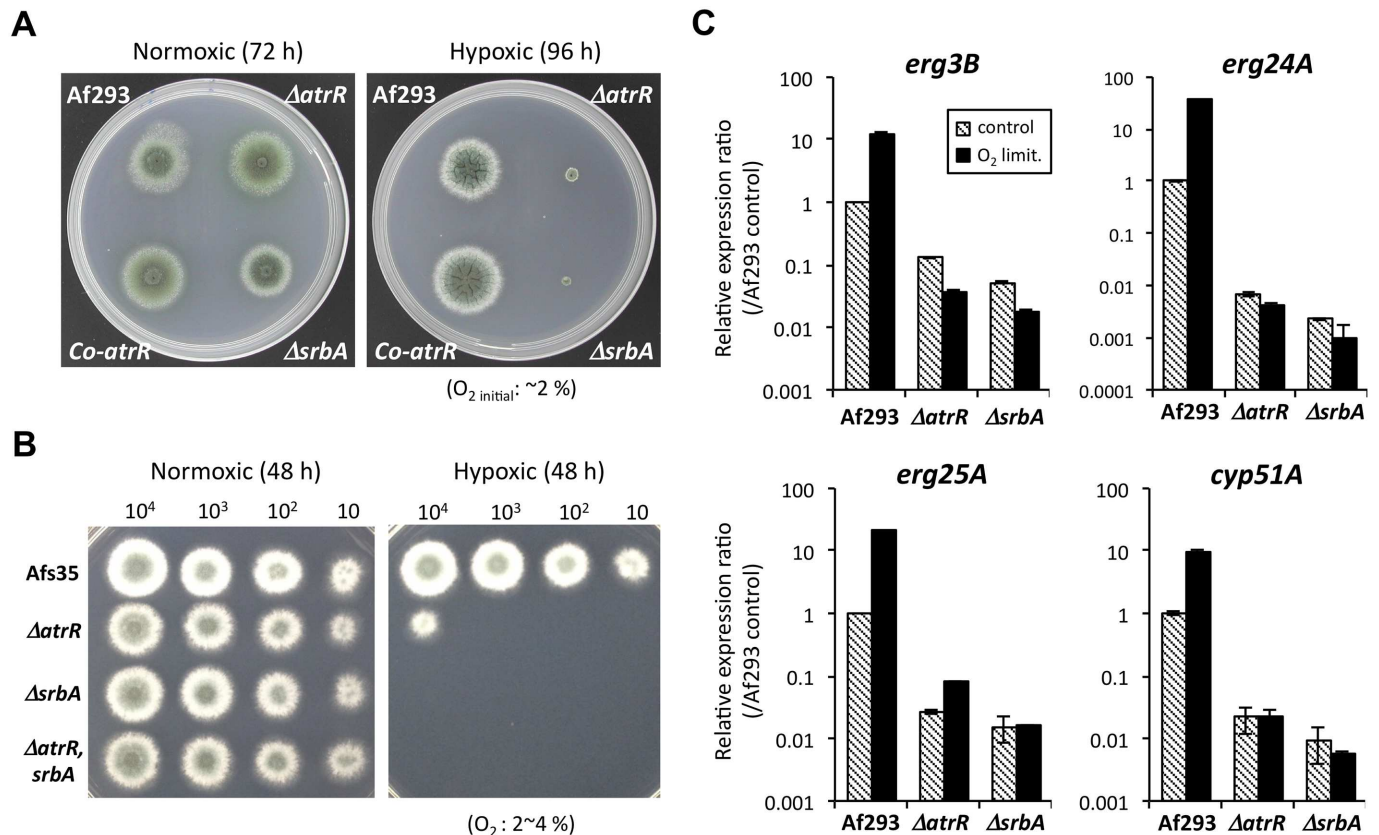

**Fig 5. AtrR is involved in adaptation to hypoxia.** (A) Growth test under normoxic and hypoxic conditions. The conidia of each strain were inoculated on GMM plate, and the plate was incubated in anaeropack system (a sealed pack) where initial concentration of oxygen was set at 2% (hypoxia condition). After 96 h, oxygen in the pack appeared to be completely consumed as estimated from no more growth of all colonies on the plate. The plate for normoxia was incubated in a regular incubator (21% oxygen) for 72 h. (B) Growth of Afs35-background strains under normoxic and hypoxic conditions. The 10 to 10<sup>4</sup> conidia of each strain were inoculated on GMM plate, and the plate was incubated in anaeropack system (a sealed pack) for 48 h, where concentration of oxygen was maintained at 2 to 4% (moderate hypoxia condition). (C) Expression levels of *erg3B*, *erg24A*, *erg25A*, and *cyp51A* genes in response to oxygen limitation (O<sub>2</sub> limit.) were determined by real-time RT PCR method. The strains were cultivated in YGMM for 18 h. A half portion of the culture was transferred into a 50 mL tube with a screwed cap. The tube was closed with a cap carefully eliminating air, and was incubated for another 1 h. The expression levels of gene of interest were normalized with that of actin gene. Relative expression ratios against Af293 (WT before oxygen limitation) are shown. Error bars represent the standard deviations based on three independent replicates.

doi:10.1371/journal.ppat.1006096.g005

the WT), and there was no induced expression in *ΔatrR* (Fig 8A). In a sharp contrast, the *ΔsrbA* strain showed WT-level basal expression and upregulation of *cdr1B*. This result clearly indicated that AtrR is responsible for *cdr1B* expression while SrbA is not involved in control of this transporter. Furthermore, we found that when treated with propiconazole, a representative of an azole fungicide, *cdr1B* expression was upregulated. This induction was also dependent on AtrR (Fig 8B) and supported a crucial role of AtrR in *cdr1B* expression in *A. fumigatus*.

### AtrR exerts direct regulation for *cyp51A* and *cdr1B*

To examine the mode of AtrR interaction with the promoters of *cyp51A* and *cdr1B*, we carried out chromatin immunoprecipitation (ChIP) analysis using an epitope-tagged allele of *atrR*. A 3x hemagglutinin (HA) tag was placed at the carboxy-terminus of the chromosomal *atrR* gene (S5A Fig). This allele was still able to confer azole resistance indicating that AtrR function was

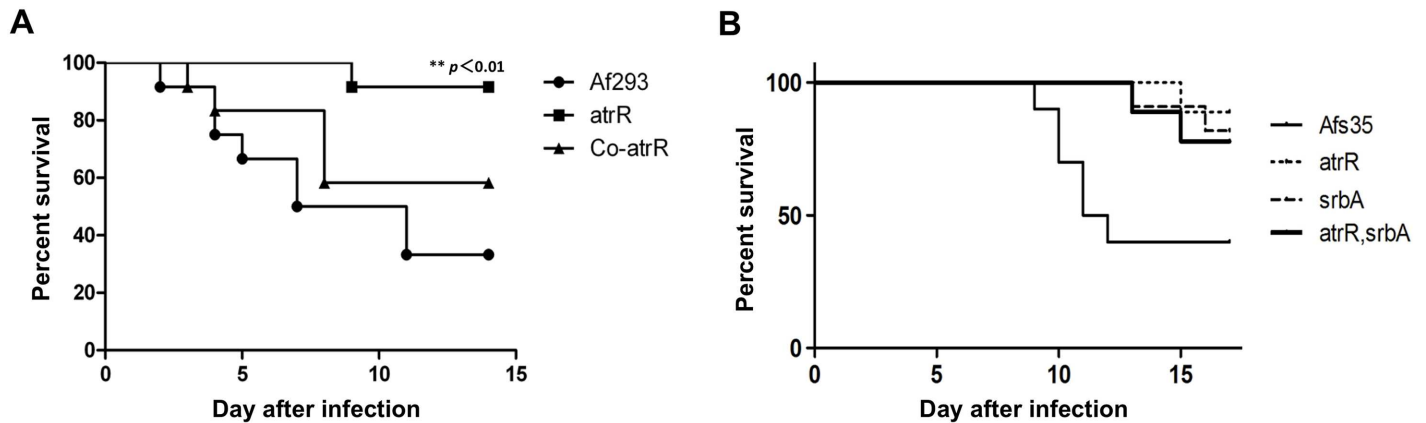

**Fig 6. AtrR is involved in *A. fumigatus* virulence.** (A) Mouse infection test with the Af293-background strains. Outbred ICR mice (n = 12) were immune-compromised by intraperitoneally injected cyclophosphamide (200 mg/kg) at Day -4, -2, 1, 3, 5, and 7. Mice were infected intratracheally with  $2.5 \times 10^7$  conidia in a volume of 25  $\mu$ L of each strain (Af293,  $\Delta$ atrR, and Co-atrR). Statistical significance was examined by log-rank test. P value for comparison between  $\Delta$ atrR and Af293 was lower than 0.01. (B) Mouse infection test with the Afs35-background strains. Outbred ICR mice (n = 9 to 11) were immune-compromised by intraperitoneally injected cyclophosphamide (150 mg/kg) at Day -4, -1, 3, 6, 9, and 12. Cortisone acetate was also administered subcutaneously at a concentration of 200 mg per kg of body weight on day -1. Mice were infected intratracheally with  $3 \times 10^5$  conidia in a volume of 30  $\mu$ L of each strain (Afs35,  $\Delta$ atrR,  $\Delta$ srbA, and  $\Delta$ atrR  $\Delta$ srbA) on Day 0.

doi:10.1371/journal.ppat.1006096.g006

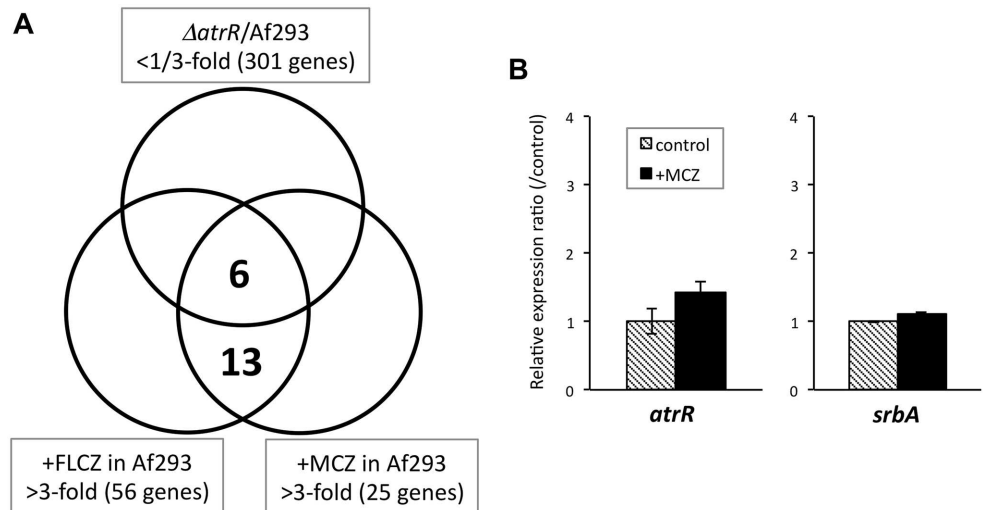

**Fig 7. FLCZ- and MCZ-responsive and AtrR-dependent genes determined by RNA-sequencing analysis.** (A) The  $\Delta$ atrR and Af293 strains were cultivated in PDB for 20 h followed by FLCZ (final concentration, 64  $\mu$ g/mL), MCZ (2  $\mu$ g/mL), or DMSO (as a control) treatment for 2 h. Number of gene with less than 1/3-fold change in expression level in  $\Delta$ atrR (DMSO) compared to Af293 (DMSO) was shown. Numbers of gene with more than 3-fold upregulation upon FLCZ or MCZ treatment (2 h) in Af293 were shown. Expression of six genes was induced upon FLCZ and MCZ treatment and these genes were dependent on AtrR, and expression of thirteen genes was induced upon FLCZ and MCZ treatment and these genes were independent on AtrR. (B) Expression level of *atrR* and *srbA* genes in response to MCZ addition was determined by real-time RT PCR method. The Af293 strain was cultivated in GMM for 24 h followed by 2 h culture with MCZ (final concentration, 2  $\mu$ g/mL) or without MCZ (control). The expression levels of gene of interest were normalized with that of actin gene. Relative expression ratios against control (Af293 without MCZ) are shown. Error bars represent the standard deviations based on three independent replicates.

doi:10.1371/journal.ppat.1006096.g007



**Table 2. RNA-sequencing analysis for Af293 and  $\Delta atrR$  in response to azole drugs.**

| ID                                               | Gene name     | RPKM  |        |        |               |       |       | $\Delta atrR$ (DMSO) /Af293 (DMSO) | Af293 (FLCZ) /Af293 (DMSO) | Af293 (MCZ) /Af293 (DMSO) | Predicted function                            |
|--------------------------------------------------|---------------|-------|--------|--------|---------------|-------|-------|------------------------------------|----------------------------|---------------------------|-----------------------------------------------|
|                                                  |               | Af293 |        |        | $\Delta atrR$ |       |       |                                    |                            |                           |                                               |
|                                                  |               | +DMSO | +FLCZ  | +MCZ   | +DMSO         | +FLCZ | +MCZ  |                                    |                            |                           |                                               |
| <b>AtrR- and azole treatment-dependent genes</b> |               |       |        |        |               |       |       |                                    |                            |                           |                                               |
| Afu4g06890                                       | <i>cyp51A</i> | 249.0 | 901.5  | 952.8  | 3.9           | 15.3  | 18.9  | 0.02                               | 3.62                       | 3.83                      | 14-alpha sterol demethylase                   |
| Afu1g03150                                       | <i>erg24A</i> | 45.6  | 605.5  | 736.4  | 2.0           | 16.7  | 35.7  | 0.04                               | 13.28                      | 16.15                     | C-14 sterol reductase                         |
| Afu1g05720                                       | <i>erg24B</i> | 95.0  | 441.6  | 409.8  | 26.2          | 23.6  | 32.1  | 0.28                               | 4.65                       | 4.31                      | C-14 sterol reductase                         |
| Afu8g02440                                       | <i>erg25A</i> | 597.8 | 1965.1 | 1906.6 | 10.0          | 13.0  | 24.7  | 0.02                               | 3.29                       | 3.19                      | C-4 methyl sterol oxidase                     |
| Afu3g00810                                       | <i>hyd1</i>   | 62.94 | 320.39 | 402.68 | 0.00          | 19.36 | 20.35 | 0.00                               | 5.09                       | 6.40                      | cholestenol delta-isomerase, putative         |
| Afu3g00820                                       |               | 15.96 | 123.97 | 118.89 | 3.63          | 2.10  | 13.82 | 0.23                               | 7.77                       | 7.45                      | putative exported protein                     |
| <b>PDR sub-family ABC transporters</b>           |               |       |        |        |               |       |       |                                    |                            |                           |                                               |
| Afu1g14330                                       | <i>cdr1B</i>  | 61.1  | 125.5  | 111.3  | 5.7           | 9.9   | 6.9   | 0.09                               | 2.06                       | 1.82                      | ABC transporter, putative                     |
| Afu1g17440                                       | <i>abcA</i>   | 0.3   | 0.0    | 0.0    | 0.3           | 0.0   | 0.4   | 1.06                               | 0.00                       | 0.00                      | ABC drug exporter AbcA                        |
| Afu2g15130                                       |               | 24.0  | 36.1   | 28.4   | 24.8          | 22.2  | 14.9  | 1.03                               | 1.50                       | 1.18                      | ABC multidrug transporter, putative           |
| Afu3g01400                                       |               | 10.6  | 26.7   | 10.1   | 27.6          | 112.7 | 59.7  | 2.59                               | 2.51                       | 0.95                      | ABC multidrug transporter, putative           |
| Afu3g07300                                       | <i>atrI</i>   | 9.7   | 11.0   | 11.1   | 18.5          | 20.2  | 18.7  | 1.91                               | 1.14                       | 1.15                      | ABC multidrug transporter, putative           |
| Afu4g01050                                       |               | 0.4   | 3.1    | 0.0    | 0.4           | 5.2   | 3.8   | 1.06                               | 8.79                       | 0.00                      | ABC multidrug transporter, putative           |
| Afu5g00790                                       |               | 2.6   | 11.3   | 10.1   | 6.8           | 17.8  | 60.1  | 2.65                               | 4.39                       | 3.91                      | ABC multidrug transporter, putative           |
| Afu5g02260                                       |               | 5.2   | 5.3    | 2.7    | 4.1           | 6.0   | 3.1   | 0.80                               | 1.03                       | 0.52                      | ABC multidrug transporter, putative           |
| Afu5g09460                                       |               | 29.4  | 20.7   | 18.6   | 37.6          | 23.6  | 24.8  | 1.28                               | 0.70                       | 0.63                      | ABC transporter, putative                     |
| Afu6g04360                                       | <i>atrF</i>   | 3.4   | 3.7    | 1.9    | 8.5           | 6.8   | 3.0   | 2.51                               | 1.10                       | 0.57                      | ABC drug exporter AtrF                        |
| Afu6g08020                                       |               | 8.1   | 9.2    | 8.1    | 7.6           | 13.8  | 7.2   | 0.94                               | 1.14                       | 1.00                      | ABC transporter, putative                     |
| Afu8g02650                                       |               | 3.3   | 5.4    | 6.8    | 5.2           | 5.1   | 5.9   | 1.59                               | 1.65                       | 2.09                      | ABC multidrug transporter, putative           |
| <b>Transcription factors</b>                     |               |       |        |        |               |       |       |                                    |                            |                           |                                               |
| Afu5g09420                                       | <i>ccg-8</i>  | 46.4  | 40.8   | 43.6   | 41.4          | 41.1  | 47.2  | 0.89                               | 0.88                       | 0.94                      | clock controled protein (Ccg-8), putative     |
| Afu1g16460                                       | <i>ads-4</i>  | 88.0  | 103.1  | 94.8   | 83.4          | 129.5 | 135.8 | 0.95                               | 1.17                       | 1.08                      | bZIP transcription factor (LziP), putative    |
| <b>Members of SREBP pathway</b>                  |               |       |        |        |               |       |       |                                    |                            |                           |                                               |
| Afu2g01260                                       | <i>srbA</i>   | 59.0  | 95.3   | 80.5   | 37.7          | 27.0  | 30.8  | 0.64                               | 1.62                       | 1.37                      | HLH transcription factor, putative            |
| Afu1g12080                                       | <i>dscA</i>   | 23.0  | 18.8   | 16.0   | 21.9          | 26.2  | 14.3  | 0.95                               | 0.82                       | 0.70                      | RING finger ubiquitin ligase (Tul1), putative |
| Afu4g11680                                       | <i>dscB</i>   | 70.6  | 60.4   | 65.5   | 28.3          | 43.5  | 53.3  | 0.40                               | 0.85                       | 0.93                      | conserved hypothetical protein                |
| Afu4g10700                                       | <i>dscC</i>   | 44.4  | 55.5   | 41.5   | 29.2          | 45.2  | 48.2  | 0.66                               | 1.25                       | 0.94                      | conserved membrane protein, putative          |

(Continued)

Table 2. (Continued)

| ID         | Gene name                   | RPKM  |       |      |               |       |      | $\Delta atrR$ (DMSO) /Af293 (DMSO) | Af293 (FLCZ) /Af293 (DMSO) | Af293 (MCZ) /Af293 (DMSO) | Predicted function                 |
|------------|-----------------------------|-------|-------|------|---------------|-------|------|------------------------------------|----------------------------|---------------------------|------------------------------------|
|            |                             | Af293 |       |      | $\Delta atrR$ |       |      |                                    |                            |                           |                                    |
|            |                             | +DMSO | +FLCZ | +MCZ | +DMSO         | +FLCZ | +MCZ |                                    |                            |                           |                                    |
| Afu3g08340 | <i>dscD</i>                 | 10.0  | 12.6  | 6.0  | 15.2          | 23.7  | 10.4 | 1.52                               | 1.26                       | 0.60                      | conserved hypothetical protein     |
| Afu1g14320 | <i>dscE</i>                 | 47.9  | 61.7  | 75.9 | 52.8          | 56.9  | 59.2 | 1.10                               | 1.29                       | 1.58                      | UBX domain protein                 |
| Afu6g12750 | <i>rbdB</i> ( <i>rbdA</i> ) | 55.6  | 45.8  | 48.9 | 35.0          | 43.3  | 21.1 | 0.63                               | 0.82                       | 0.88                      | rhomboid family protein, putative  |
| Afu6g02150 | <i>sppA</i>                 | 28.6  | 36.4  | 26.7 | 27.2          | 16.7  | 21.9 | 0.95                               | 1.27                       | 0.93                      | signal peptide peptidase, putative |

doi:10.1371/journal.ppat.1006096.t002

maintained (S5B Fig). ChIP experiments were carried out as described [30] with immunoprecipitated chromatin examined for enrichment of fragments corresponding to the promoter regions of *cyp51A*, *cdr1B* and *act1*. We found the strongest level of enrichment for the *cdr1B* promoter with easily detectable recovery of the *cyp51A* promoter (Fig 9A). ChIP experiments using the *act1* promoter did not produce any enrichment above background when comparing ChIP reactions carried out on strains lacking the HA tag versus a strain expressing the tagged AtrR protein. This specific enrichment for the *cdr1B* and *cyp51A* promoters was further confirmed by quantitative real-time PCR (Fig 9B). These data are consistent with AtrR acting at sites upstream from both *cdr1B* and *cyp51A*. Specificity of this interaction is supported by the lack of enrichment of the *act1* promoter region.

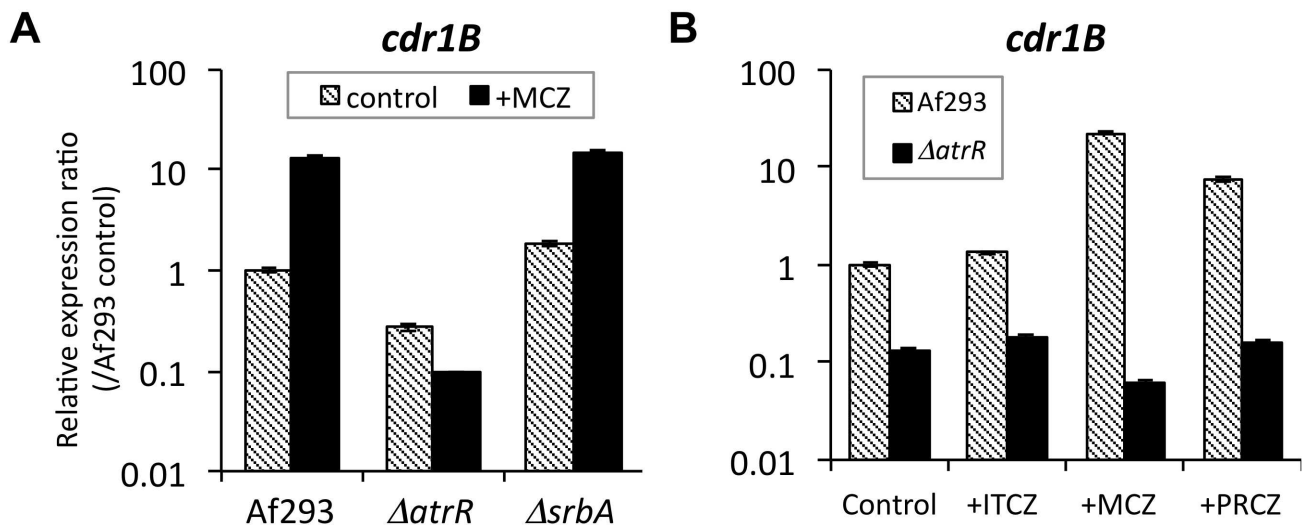

**Fig 8. Expression levels of the *cdr1B* gene in response to azoles were determined by real-time RT PCR method.** (A) AtrR is involved in regulating *cdr1B* expression. Af293,  $\Delta atrR$ , and  $\Delta srbA$  strains were cultivated in GMM for 24 h followed by 2 h culture with or without MCZ (final concentration, 2  $\mu$ g/mL). (B) Af293 and  $\Delta atrR$  strains were cultivated in GMM for 24 h followed by 2h culture with ITCZ, MCZ, or propiconazole (PRCZ) (final concentrations, 2  $\mu$ g/mL). The expression level of *cdr1B* was normalized with that of actin gene. Relative expression ratios against Af293 (WT without drug) are shown. Error bars represent the standard deviations based on three independent replicates.

doi:10.1371/journal.ppat.1006096.g008

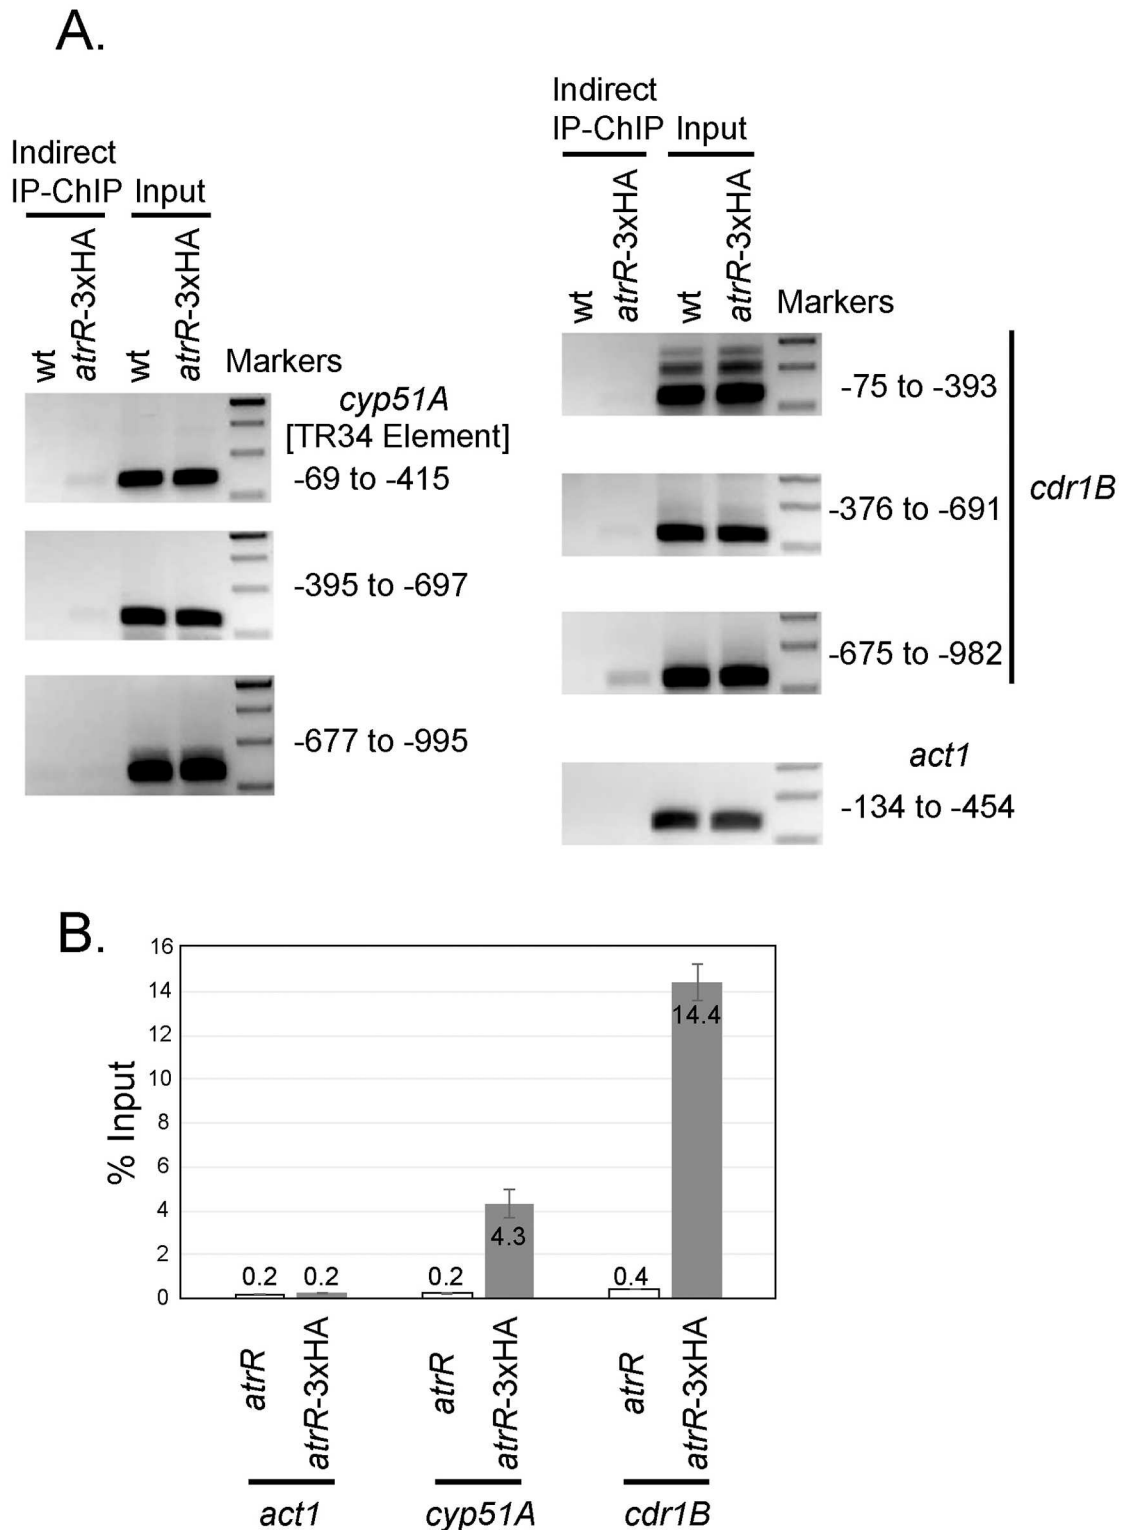

**Fig 9. Chromatin immunoprecipitation assay showing binding of AtrR protein to the promoter regions of *cyp51A* and *cdr1B*.** (A) Chromatin immunoprecipitation (ChIP) was done using a mouse monoclonal antibody directed against the HA epitope. Crosslinked chromatin was prepared from a WT strain or an isogenic strain expressing a 3x HA-tagged form of *atrR* (shown as *atrR-3xHA*). Immunoprecipitated DNA was examined by semiquantitative RT-PCR analysis using primers that amplified the *cyp51A* and *cdr1B* promoters. The relative enrichment of the *act1* promoter was also assessed

as a control for a promoter not responsive to AtrR. (B) Quantitative analysis for enrichment of the *cyp51A* and *cdr1B* promoters by real-time RT PCR method. Chromatin immunoprecipitated from the *atrR*-3× HA strains exhibited a 20-fold enrichment of *cyp51A* promoter DNA along with a ~33-fold enrichment of *cdr1B* promoter sequence. No detectable enrichment of *act1* was found. Data are presented as the mean and standard error of two separate ChIP experiments. % input represent signals obtained from the ChIP that are divided by signals obtained from the input sample.

doi:10.1371/journal.ppat.1006096.g009

### The role of AtrR, SrbA, Cdr1B, and Cyp51A in sensitivity to azoles antifungals

To compare the physiological importance of the *atrR*, *srbA*, *cdr1B*, and *cyp51A* genes, we generated a series of isogenic strains lacking these important drug resistance loci in the Afs35 background. Representative isolates were then assessed for their drug resistance by determining their minimum inhibitory concentration (MIC) for a variety of antifungal drugs. The MICs of fluconazole, itraconazole, voriconazole, and miconazole were lowered in  $\Delta atrR$  and  $\Delta srbA$  compared to the WT (Afs35) (Table 3). The MICs of voriconazole and miconazole were more depressed in the  $\Delta atrR$  strain than in the corresponding  $\Delta srbA$  mutant, which are consistent with the results of growth inhibition assay using the Af293 background strains (Fig 2B). The double deletion mutant ( $\Delta atrR \Delta srbA$ ) exhibited increased susceptibility for azoles compared to either of single mutants. In the  $\Delta cdr1B$  and  $\Delta cyp51A$ , the MICs of itraconazole, voriconazole, and miconazole were lowered (50%-87.5%), compared to the WT. These drug susceptibility tests confirmed that the transcription factors AtrR and SrbA, the ABC transporter Cdr1B, and the target enzyme Cyp51A were required for normal azole resistance. Importantly, simultaneous loss of the transcription factors AtrR and SrbA caused the most profound azole sensitivity of all the genetic alterations tested.

### Deleting *atrR* cures azole resistant phenotype in the clinical strain with Cyp51A G54E mutation

Considering the important role of AtrR in azole resistance, we wanted to evaluate the contribution of the *atrR* gene to azole resistance in a clinical isolate. We deleted the *atrR* gene from the genome of the clinical isolate IFM 61567 that contains a known itraconazole resistance-conferring mutation in its *cyp51A* gene (Cyp51A G54E). We obtained three independent

**Table 3. Minimal inhibitory concentrations of antifungals in *A. fumigatus* mutant strains.**

| Strain                       | MEC (mg/L)* <sup>1</sup> |      | MIC (mg/L)* <sup>1</sup> |      |      |       |        |       |       |
|------------------------------|--------------------------|------|--------------------------|------|------|-------|--------|-------|-------|
|                              | MCFG                     | CPFG | AMPH                     | 5-FC | FLCZ | ITCZ  | VCZ    | MCZ   | PCZ   |
| Afs35 (WT)                   | <0.015                   | n.d. | 1                        | >64  | >64  | 0.5   | 0.5    | 2     | n.d.  |
| $\Delta cdr1B$               | <0.015                   | n.d. | 1                        | >64  | >64  | 0.25  | 0.125  | 1     | n.d.  |
| $\Delta cyp51A$              | <0.015                   | n.d. | 1                        | >64  | 16   | 0.25  | 0.25   | 0.25  | n.d.  |
| $\Delta atrR$                | <0.015                   | n.d. | 1                        | 16   | 4    | 0.125 | <0.015 | <0.03 | n.d.  |
| $\Delta srbA$                | <0.015                   | n.d. | 1                        | >64  | 2    | 0.125 | 0.03   | 0.06  | n.d.  |
| $\Delta atrR, srbA$          | <0.015                   | n.d. | 1                        | >64  | 0.5  | 0.06  | <0.015 | <0.03 | n.d.  |
| IFM 61567                    | <0.015                   | 0.25 | 2                        | 64   | >64  | >8    | 1      | 0.5   | 8     |
| IFM 61567 $\Delta atrR$ No.2 | <0.015                   | 0.25 | 2                        | >64  | 4    | 0.125 | 0.06   | 0.06  | 0.06  |
| IFM 61567 $\Delta atrR$ No.3 | <0.015                   | 0.25 | 2                        | 64   | 4    | 0.125 | 0.06   | 0.06  | ≤0.06 |
| IFM 61567 $\Delta atrR$ No.4 | <0.015                   | 0.25 | 2                        | 64   | 4    | 0.25  | 0.06   | 0.06  | ≤0.06 |

\*<sup>1</sup> n.d. indicates 'not determined'.

Micafungin: MCFG; caspofungin: CPFG; amphotericin B: AMPH; flucytosine: 5-FC; fluconazole: FLCZ; itraconazole: ITCZ; voriconazole: VRCZ; miconazole: MCZ; posaconazole: PCZ.

doi:10.1371/journal.ppat.1006096.t003



deletion mutant strains (IFM 61567  $\Delta atrR$  No.2-4) and compared the MICs of antifungals with the starting strain (Table 3). The parental strain IFM 61567 showed resistance to itraconazole and posaconazole, but retained susceptibility to voriconazole and miconazole. All the three  $\Delta atrR$  deletion strains were highly susceptible to itraconazole (MIC: 0.125~0.25) and posaconazole (MIC:  $\leq 0.06$ ~0.06), as well as to voriconazole (MIC: 0.06) and miconazole (MIC: 0.06), which revealed these strains are not resistant to azoles, even if judged from a clinical endpoint. We also used a disc-diffusion assay to confirm azole susceptibility for these mutants upon fluconazole, miconazole, and itraconazole treatment (Fig 10A). Together, these

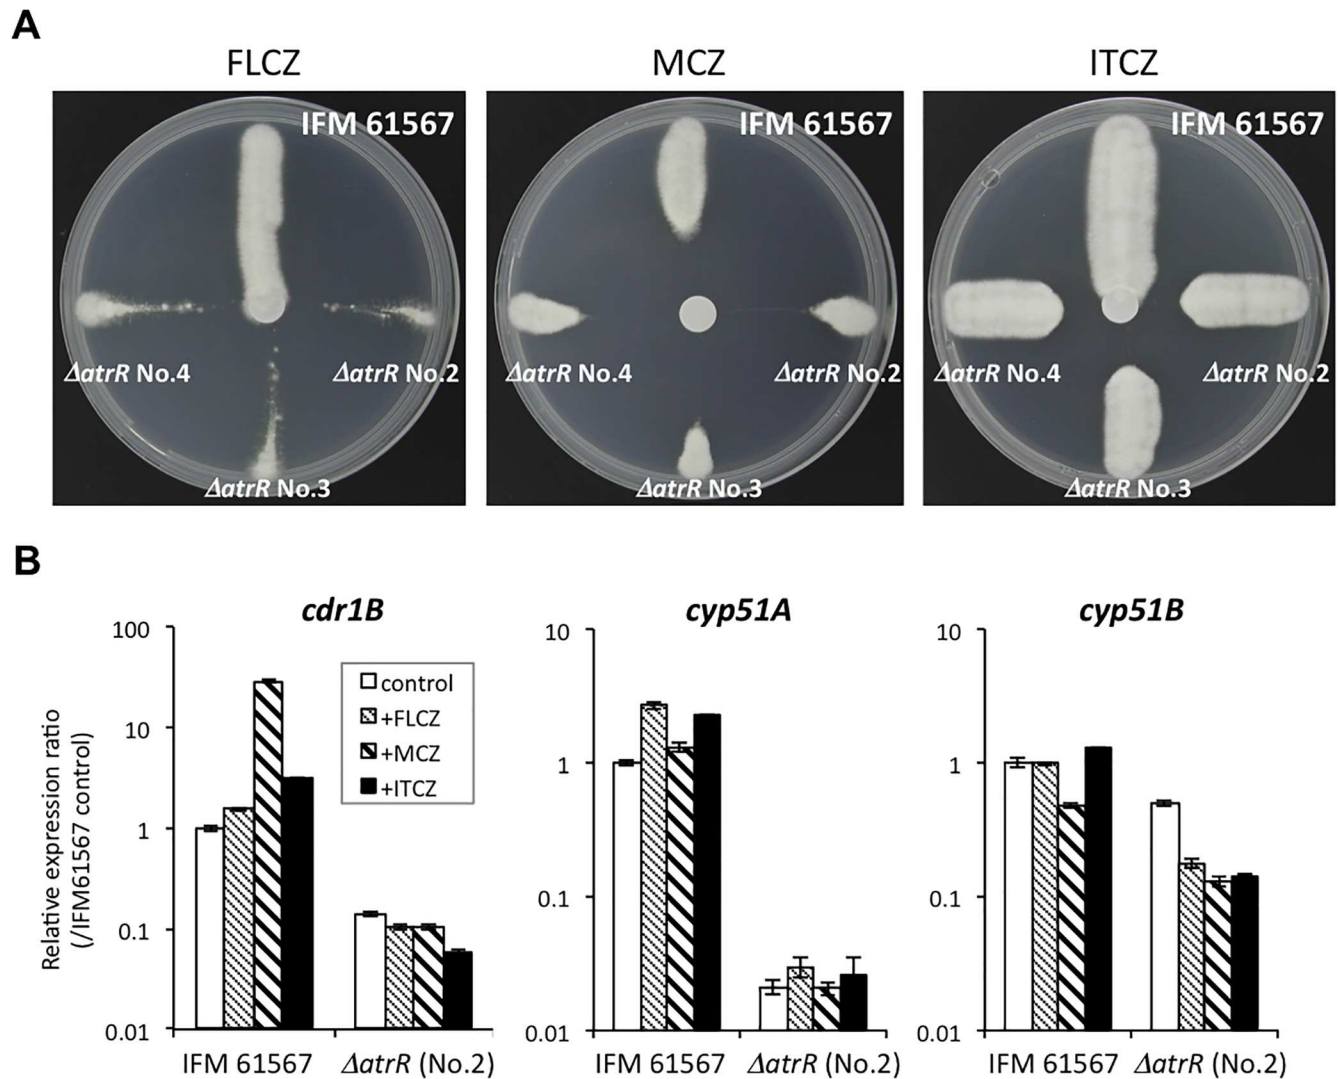

**Fig 10. The clinical azole resistant strain with an *atrR* gene deleted shows azole hyper-susceptibility.** (A) Drug susceptibility test by paper-disc diffusion assay. A paper-disc was placed on center of the GMM plate, and 10  $\mu$ l of drug solution indicated was dropped on it (FLCZ: 10 mg/mL; MCZ: 10 mg/mL; ITCZ: 10 mg/mL). An azole resistant strain IFM 61567 and the independently obtained *atrR* deleted strains ( $\Delta atrR$  No. 2–4) were streaked outward from the center. The plates were incubated for 48 h before photographed. The IFM 61567 fully grew along the streaked line regardless of the presence of FLCZ and ITCZ, whereas the  $\Delta atrR$  mutants showed growth inhibition. (B) Expression levels of *cdr1B*, *cyp51A*, and *cyp51B* genes in IFM 61567 and the *atrR*-deleted strain ( $\Delta atrR$  No.2) were determined by real-time RT PCR method. IFM 61567 and the  $\Delta atrR$  were cultivated in YPG for 18 h followed by 1 h culture with or without FLCZ, MCZ, and ITCZ (final concentrations, 2  $\mu$ g/mL). The expression levels of genes of interest were normalized with that of actin gene. Relative expression ratios against IFM 61567 without drug (control) are shown. Error bars represent the standard deviations based on three independent replicates.

doi:10.1371/journal.ppat.1006096.g010

different assays demonstrated that the  $\Delta atrR$  strains were more sensitive to these azoles compared to the parental resistant strain (IFM 61567). We confirmed that the expression levels of *cdr1B*, *cyp51A*, and *cyp51B* were markedly decreased in the  $\Delta atrR$  derivatives (Fig 10B), as was observed earlier for  $\Delta atrR$  in Af293 background. Collectively, our results showed that the *atrR* gene deletion led to azole sensitization even in this clinically isolated multi-azole resistant strain with a G54E mutation in Cyp51A.

## Discussion

In the present study, we identified a novel transcription factor called AtrR that is essential for azole resistance in the human pathogen *A. fumigatus* as well as the industrially important fungus *A. oryzae* and the model fungus *A. nidulans*. Our results using the ChIP assay support the view that AtrR exerts direct transcriptional regulation on *cyp51A* and *cdr1B* expression via promoter association. In filamentous fungal pathogens, AtrR is the second transcriptional regulator, after SrbA, regulating the *cyp51A* gene. To the best of our knowledge, this is the first report of a direct transcriptional regulator for azole resistance-related ABC transporter genes in filamentous fungi including *A. fumigatus*. AtrR is widely found in an array of filamentous fungi including plant and human pathogenic fungi. Therefore, this finding sheds important new light on how filamentous fungi react and adapt to azole challenge via the coordinate upregulation of both sterol biosynthesis and ABC transporter gene expression.

## Regulation of ABC transporters in *A. fumigatus*

The ABC transporters in the PDR sub-family are one of the main players implicated in azole resistance in fungi [34]. It has been demonstrated in many fungi, including plant and human pathogens, that certain ABC transporter genes were up-regulated in response to azole treatment, and loss of genes encoding PDR-type ABC transporters resulted in hypersensitivity to azoles [35–37]. According to phylogenetic analysis, the *A. fumigatus* PDR sub-family (also called ABCG family) contains 12 ABC transporters [38]. Among these include the already characterized Cdr1B, AbcA, AtrF, and AtrI, deletion mutants of which showed decreased susceptibility to azoles [20,22,39,40]. Our RNA-seq analysis showed that only a few ABC transporter genes were upregulated upon miconazole and fluconazole treatment, and that Cdr1B seemed to be the only transporter regulated by AtrR (Table 2). Studies of Cdr1B revealed a clinical relevance as an azole resistant strain overexpressing *cdr1B* has been isolated from a patient [20]. In that report, genetic evidence was provided that azole resistance was caused by *cdr1B* overexpression. However, the mechanism of that overexpression was not assessed in the paper. It is possible that elevated activation via AtrR led to the increased *cdr1B* transcription.

In a model filamentous fungus *Neurospora crassa*, Cdr4, an ortholog of Cdr1B or *S. cerevisiae* Pdr5p, plays a major role in azole tolerance [41]. Although direct interaction with the promoter region was not investigated, two transcription factors were characterized to be involved in regulating the *cdr4* expression. The putative transcription factor CCG-8, which has been identified as a clock-controlled gene, positively regulates *cdr4* as well as the azole target gene *erg11*, an ortholog of *A. fumigatus* *cyp51A* [42]. Ketoconazole challenge induced *cdr4* and *erg11* expression in the WT, whereas the induction levels were partly decreased in the *cgg-8* deletion mutant. The CCG-8 ortholog (Afu5g09420) in *A. fumigatus* has not been characterized so far. A role of the bZip transcription factor ADS-4 was also investigated with regard to azole resistance in *N. crassa* [43]. A null mutant lacking *ads-4* showed hypersensitivity to itraconazole and ketoconazole. ADS-4 was involved in regulating *cdr4* as well as *erg5* encoding a sterol C-22 desaturase. The ortholog of *ads-4* (Afu1g16460) was also characterized in *A. fumigatus* with its deletion strain, which showed a slightly higher sensitivity to azoles compared to the parental

strain. Our RNA-seq data revealed that expression of the two transcription factors (CCG-8 and ADS-4) was not affected by *atrR* deletion in *A. fumigatus* (Table 2), which supports the idea that AtrR is an independent regulator of *cdr1B* and *cyp51A* expression. The molecular mechanism of how AtrR functions will be an essential goal of future study.

In the pathogenic yeasts, *C. albicans* and *C. glabrata*, the molecular mechanisms underlying transcriptional regulation of ABC transporters (functioning as drug efflux pump) have been more intensively studied. The azole resistance-related ABC transporter Cdr1 (an ortholog of *A. fumigatus* Cdr1B and *S. cerevisiae* Pdr5p) is directly regulated by a Zn<sub>2</sub>-Cys<sub>6</sub> transcription factor Pdr1 in *C. glabrata* [44]. In a clinical setting, azole resistant strains with elevated *CDR1* expression were commonly recovered. In most of the strains, *CDR1* overexpression was attributed to constitutively activated Pdr1 that possessed a gain-of-function mutation [45,46]. As stated earlier, *Candida* has no ortholog of AtrR. Indeed, *Candida* Pdr1 and *A. fumigatus* AtrR only share sequence homology in a Zn<sub>2</sub>-Cys<sub>6</sub> domain at the N-terminus. The most notable distinctive role between the ABC transporter regulating transcription factors, Pdr1 and AtrR, is that AtrR expression is not substantially upregulated in response to azole treatment (Fig 7B), whereas Pdr1 itself is induced by azole treatment [47]. Collectively our results suggest that the transcriptional regulator of azole resistance-related ABC transporters, particularly for a Cdr1-type transporter, is evolutionarily distinct between yeasts and filamentous fungi.

### Regulation of *cyp51A* gene by AtrR in association with SrbA

Ergosterol biosynthesis is a crucial process that is specific to fungi. Antifungal drugs such as azoles and polyenes target this biosynthetic pathway or the ergosterol molecule directly. The SREBP SrbA is a well-studied transcription factor that regulates ergosterol pathway-related genes including *erg3*, *erg24*, *erg25*, and *cyp51A* [27,30]. Deletion of *srbA* resulted in a disturbed sterol profile and hypersusceptibility to azole drugs. Intriguingly, a deletion mutant of *atrR* revealed strikingly similar phenotypes to those of the *srbA* deletion mutant. In addition to the regulation of *erg* genes and azole susceptibility, hypoxia adaptation and virulence attenuation were phenocopied between the *srbA* and *atrR* null mutants. This striking overlap argues that AtrR and SrbA closely function to regulate the ergosterol biosynthesis pathway. Recent studies provided information on the contributors in the SREBP pathway including the Golgi Dsc E3 ligase complex members (DscA-E), a rhomboid family protease RbdB (also reported as RbdA), and an aspartyl peptidase SppA [48–51]. Although these contributors are essential for SrbA function, transcription levels of these genes including *srbA* were not largely affected by deleting AtrR (Table 2). This suggested that AtrR did not act upstream via the SREBP pathway at a transcriptional level but rather may have its own independent regulatory input. The possibility that AtrR interacts with SrbA to function as a transcriptional regulator complex over the genes related to ergosterol biosynthesis, thus far, cannot be ruled out.

Previous studies by others revealed that SrbA binds to the promoter region of the *cyp51A* gene (also known as *erg11A*) [27,30]. ChIP-seq data indicated that SrbA-enrichment peaks resided in the *cyp51A* promoter region at the site 302 bp upstream from the initiation codon [30]. Accordingly, a putative SrbA binding site similar to the mammal SRE binding motif (TCACNCCAC) was found in this same region. Notably, the peak of SrbA-enrichment and the putative binding site are contained within a 34 bp sequence that had been identified as a tandem repeat sequence in azole resistant strains [11,13]. In our ChIP data for *cyp51A* with AtrR-3HA, a slightly more intense band was exhibited by probing with -69 to -415 region than with -395 to -697 (Fig 9A). This suggested that the binding motif of AtrR in the *cyp51A* promoter is more likely to be present at the region from -69 to -415 rather than -395 to -697. Gal4-type Zn<sub>2</sub>-Cys<sub>6</sub> transcription factors typically bind to inverted CGG triplets as

homodimers [52]. We therefore searched for CGG-N<sub>x</sub>-CCG motifs in the *cyp51A* promoter region (to -1000). Interestingly, we found three regions with the motifs, CGG-N<sub>10</sub>-CCG, CGG-N<sub>18(9)</sub>-CCG, CGG-N<sub>17(12)</sub>-CCG, at -949 to -934, -796(-787) to -773, and -314(-309) to -292, respectively. The last one is located in the 34 bp of tandem repeat-related sequence and thus is adjacent to the putative SrbA-binding site. From these data, we anticipate that AtrR and SrbA could cooperatively function to regulate *cyp51A* expression at the proximal sites in the promoter region. Additionally, three motifs (CGG-N<sub>5</sub>-CCG, CGG-N<sub>21</sub>-CCG, and CGG-N<sub>20</sub>-CCG) were found in the *cdr1B* promoter at the sites (-723 to -713, -537 to -511, and -495 to -470). For the other 51 AtrR-dependent genes identified in RNA-sequencing analysis, the potential CGG-N<sub>x</sub>-CCG motifs were widely detected in the promoter region (-1000 to 0) of several genes (S1 Table). Determination of the accurate binding sequences for AtrR is crucial to allow detailed understanding of the molecular function of AtrR.

### Physiological impact of AtrR on hypoxia adaptation and pathogenicity

As molecular oxygen is a critical component for several biochemical processes, fungi must have the ability to adapt to hypoxic conditions. Previous studies showed that ergosterol biosynthesis is one of the fungal metabolic pathways most responsive to oxygen level [27,32,53,54]. Several enzymes in the fungal ergosterol biosynthesis pathway, such as the cytochrome P450 Erg3 and Erg11/Cyp51, require molecular oxygen as well as heme. Heme biosynthesis is also an oxygen-requiring pathway. The SREBP pathway coordinates oxygen levels with sterol and heme biosynthesis since these pathways are responsive to levels of this gas [28,30,55]. In the present study, AtrR was found to be involved in hypoxia adaptation as seen before for SrbA. In fact, the expression levels of *cyp51A*, *erg3B*, *erg24A*, and *erg25A* were induced in response to oxygen limitation in an AtrR- and SrbA-dependent manner (Fig 5B). Although the mechanism is still unknown, AtrR is responsible for sterol regulation under oxygen-limited condition, likely in association with SREBP pathway.

Sterol regulation of *S. cerevisiae* and *Candida* species involves a Gal4-type Zn<sub>2</sub>-Cys<sub>6</sub> transcription factor Upc2. Interestingly, these yeasts lack an SREBP pathway. A recent finding in the lipid degrading yeast *Yarrowia lipolytica* that retains an intact SREBP, called YlSre1, revealed that YlSre1 only played a minor role while Upc2 played a major role in sterol regulation, hypoxia adaptation and azole resistance [56]. Therefore it was proposed that Upc2 has replaced the role of SREBPs in sterol regulation in these yeasts. From a comparison of the amino acid sequences, it is evident that AtrR is not an orthologue of Upc2.

Several lines of data have supported an intimate relationship between hypoxic adaptation and pathogenicity of pathogenic fungi. 1) The murine lung infected by fungi is a hypoxic environment at the infection site, which was revealed by a hypoxic indicator [57], and 2) SREBP mutants of *C. neoformans* (Sre1) and *A. fumigatus* (SrbA) which are unable to grow under hypoxic condition showed an avirulent phenotype [27,32]. We demonstrated that AtrR is also required for both hypoxic adaptation and *A. fumigatus* virulence. As AtrR is a fungal specific transcription factor, it would be a potential drug target, inactivation of which could suppress *A. fumigatus* *in vivo* growth during the infection process.

### Deleting AtrR overcame Cyp51A-related azole resistance

One of the most noteworthy results in the present study is that deleting the *atrR* gene effectively sensitized the clinically isolated multi azole-resistant strain (Fig 10A and Table 3). Loss of *atrR* from this clinical strain reduced expression levels of *cyp51A* and *cyp51B* to the low level seen in the other laboratory lineage (Af293-background) (Fig 10B). This, in turn, likely reduced the amount of target proteins, Cyp51A and Cyp51B, in the cells. Even though the



strain carried a G54E substitution in the Cyp51A protein, the reduction in gene transcription contributed to the resulting strains showing hypersensitivity to azoles in contrast to the resistant parental strain IFM 61567. Alternatively, accumulation of toxic intermediates at multiple AtrR-regulated steps (Erg3B, Cyp51A, Erg24A, and Erg25A) in the ergosterol biosynthesis pathway could also contribute to reacquisition of azole sensitivity. Even when *cyp51A* expression was heterologously elevated in an *atrR* background, this was insufficient to suppress the azole-susceptibility of this mutant strain (Fig 3B). The same result was also observed in *srbA* mutant background (Fig 3B), and is consistent with earlier work [29]. These results suggested that defective *cyp51A* expression was not the only reason for the azole-sensitivity in *atrR* or *srbA* deletion mutants. If judged by MIC values caused by loss of AtrR (itraconazole: 0.125–0.25; voriconazole: 0.06; posaconazole:  $\leq$ 0.06–0.06), the resultant deletion mutants would be curable in a conventional azole drug therapy. This fact clearly illuminates a path toward development of new azole-sensitizing agent that could overcome Cyp51A-related azole resistance mechanisms.

In this study, we characterized a transcriptional factor designated AtrR that is responsible for a novel *A. fumigatus* intrinsic azole resistance mechanism. AtrR crucially governs adaptation to azole treatment in the sense that both target (*cyp51A*) and efflux pump (*cdr1B*) are

**Table 4. Strains used in this study.**

| Strain                                     | Background strain | Genotype                                                                                                |
|--------------------------------------------|-------------------|---------------------------------------------------------------------------------------------------------|
| <i>A. oryzae</i> RIB40 niaD300             | WT                | <i>niaD</i> -                                                                                           |
| <i>A. oryzae</i> +pAPLTN                   | RIB40             | <i>niaD</i> +                                                                                           |
| <i>A. oryzae</i> +TF1                      | RIB40             | <i>niaD</i> +, <i>P amyB</i> -TF1                                                                       |
| <i>A. oryzae</i> +TF2                      | RIB40             | <i>niaD</i> +, <i>P amyB</i> -TF2                                                                       |
| <i>A. oryzae</i> +TF3                      | RIB40             | <i>niaD</i> +, <i>P amyB</i> -TF3                                                                       |
| <i>A. oryzae</i> +TF4                      | RIB40             | <i>niaD</i> +, <i>P amyB</i> -TF4                                                                       |
| <i>A. oryzae</i> +TF5                      | RIB40             | <i>niaD</i> +, <i>P amyB</i> -TF5                                                                       |
| <i>A. oryzae</i> LigD                      | RIB40             | $\Delta$ <i>ligD</i> :: <i>sC</i> , <i>niaD</i> -                                                       |
| <i>A. oryzae</i> $\Delta$ <i>atrR</i>      | RIB40             | $\Delta$ <i>ligD</i> :: <i>sC</i> , <i>niaD</i> -, <i>AoatrR</i> :: <i>ptrA</i>                         |
| <i>A. nidulans</i> KU70                    | ABPU1             | <i>pyrG</i> -, <i>pyroA</i> -, <i>biA1</i> -, <i>ku70</i> :: <i>argB</i>                                |
| <i>A. nidulans</i> $\Delta$ <i>atrR</i>    | KU70              | <i>pyrG</i> -, <i>pyroA</i> -, <i>biA1</i> -, <i>ku70</i> :: <i>argB</i> , <i>AnatrR</i> :: <i>ptrA</i> |
| Af293                                      | WT                | -                                                                                                       |
| $\Delta$ <i>atrR</i>                       | Af293             | <i>atrR</i> :: <i>hph</i>                                                                               |
| <i>Co-atrR</i>                             | Af293             | <i>atrR</i> :: <i>hph</i> , <i>atrR</i> <sup>+</sup> - <i>ptrA</i>                                      |
| $\Delta$ <i>srbA</i>                       | Af293             | <i>srbA</i> :: <i>ptrA</i>                                                                              |
| Af293+ <i>PthiA-cyp51A</i>                 | Af293             | <i>PthiA-cyp51A-phle</i>                                                                                |
| $\Delta$ <i>atrR</i> + <i>PthiA-cyp51A</i> | Af293             | <i>atrR</i> :: <i>hph</i> , <i>PthiA-cyp51A-phle</i>                                                    |
| $\Delta$ <i>srbA</i> + <i>PthiA-cyp51A</i> | Af293             | <i>srbA</i> :: <i>ptrA</i> , <i>PthiA-cyp51A-phle</i>                                                   |
| AfS35                                      | WT                | $\Delta$ <i>akuA-loxP</i>                                                                               |
| $\Delta$ <i>atrR</i>                       | AfS35             | $\Delta$ <i>akuA-loxP</i> , <i>atrR</i> :: <i>hph</i>                                                   |
| $\Delta$ <i>srbA</i>                       | AfS35             | $\Delta$ <i>akuA-loxP</i> , <i>srbA</i> :: <i>ptrA</i>                                                  |
| $\Delta$ <i>atrR</i> , <i>srbA</i>         | AfS35             | $\Delta$ <i>akuA-loxP</i> , <i>atrR</i> :: <i>hph</i> , <i>srbA</i> :: <i>ptrA</i>                      |
| $\Delta$ <i>cdr1B</i>                      | AfS35             | $\Delta$ <i>akuA-loxP</i> , <i>cdr1B</i> :: <i>ptrA</i>                                                 |
| $\Delta$ <i>cyp51A</i>                     | AfS35             | $\Delta$ <i>akuA-loxP</i> , <i>cyp51A</i> :: <i>ptrA</i>                                                |
| SPF89                                      | AfS35             | $\Delta$ <i>akuA-loxP</i> , <i>atrR</i> -3xHA- <i>hph</i>                                               |
| IFM 61567                                  | -                 | <i>cyp51A</i> (G54E)                                                                                    |
| IFM 61567 $\Delta$ <i>atrR</i> No2         | IFM 61567         | <i>cyp51A</i> (G54E), <i>atrR</i> :: <i>hph</i>                                                         |
| IFM 61567 $\Delta$ <i>atrR</i> No3         | IFM 61567         | <i>cyp51A</i> (G54E), <i>atrR</i> :: <i>hph</i>                                                         |
| IFM 61567 $\Delta$ <i>atrR</i> No4         | IFM 61567         | <i>cyp51A</i> (G54E), <i>atrR</i> :: <i>hph</i>                                                         |

doi:10.1371/journal.ppat.1006096.t004

transcriptionally co-regulated by AtrR. The experiment using a clinical azole-resistant isolate revealed a potential clinical relevance of AtrR. Our findings provide the first direct evidence that AtrR serves as a critical coordinator of both ergosterol biosynthesis and levels of a plasma membrane ABC transporter that can efflux azole drugs, the major antifungal drug in current use against pathogenic fungi.

## Materials and Methods

### Ethics statement

The principles that guide our studies are based on the Guidelines for Proper Conduct of Animal Experiments formulated by Science Council of Japan in June 1, 2006. All protocol used in this study were approved by the institutional animal care and use committee of Chiba University (Permit Number: DOU25-207, DOU26-228, and DOU28-345). All efforts were made to minimize suffering in strict accordance with the principles outlined by the Guidelines for Proper Conduct of Animal Experiments. Animals were clinically monitored at least daily and humanely sacrificed if moribund (defined by lethargy, dyspnea and weight loss). All stressed animals were sacrificed by cervical dislocation.

### Strains and growth media

*A. oryzae*  $\Delta ligD::sC$  (*niaD*<sup>-</sup>) [58] and *A. nidulans*  $\Delta ku70$  (*pyrG*<sup>-</sup>, *pyroA*<sup>-</sup>, *biA1*<sup>-</sup>, *ku70::argB*) strains (derived from the strains, RIB40 and ABPU1, respectively) were used for a generation of deletion mutants of the AtrR-family genes. For identification of the *AoatrR*, the *A. oryzae* strains overexpressing a TF gene were used, which were obtained from a genetic library prepared by Noda Institute for Scientific Research, Kikkoman Corporation [33]. Briefly, the transcription factor genes of interest were cloned into an overexpression vector (pAPLTN) [59], which drives the expression under the *amyB* promoter system in the presence of maltose as a sole carbon source. *A. fumigatus* strains Af293 and Afs35 (*akuA::loxP*) were used to generate the following deletion strains and *atrR* complemented strain:  $\Delta atrR$ , *Co-atrR*,  $\Delta srbA$ ,  $\Delta cyp51A$ ,  $\Delta cdr1B$ ,  $\Delta atrR, srbA$ , Af293+*PthiA-cyp51A*,  $\Delta atrR+PthiA-cyp51A$ , and  $\Delta srbA+PthiA-cyp51A$ . The clinical strain IFM 61567 was isolated in 2011 in Japan from a patient with itraconazole treatment. The mutation in *cyp51A* gene in the strain was identified as a procedure described previously [60]. The fungal strains used in this study are listed in Table 4. All strains were routinely cultivated in potato dextrose agar (PDA), potato dextrose broth (PDB), 0.1% yeast extract-containing glucose minimal medium (YGMM), or glucose minimal medium (GMM) at 37°C. For *A. oryzae* or *A. nidulans* culture, Czapek-Dox (CD) medium was used, which contained 1% maltose or 1% glucose, 68.8 mM (NH<sub>4</sub>)<sub>2</sub>SO<sub>4</sub>, trace elements (1 μg/ml FeSO<sub>4</sub>·7H<sub>2</sub>O, 8.8 μg/ml ZnSO<sub>4</sub>·7H<sub>2</sub>O, 0.4 μg/ml CuSO<sub>4</sub>·5H<sub>2</sub>O, 0.15 μg/ml MnSO<sub>4</sub>·4H<sub>2</sub>O, 0.1 μg/ml Na<sub>2</sub>B<sub>4</sub>O<sub>7</sub>·10H<sub>2</sub>O, 0.05 μg/ml (NH<sub>4</sub>)<sub>6</sub>Mo<sub>7</sub>O<sub>24</sub>·4H<sub>2</sub>O) and appropriate supplements such as 1 mg/ml uridine, 0.02 μg/ml biotin, 2.5 μg/ml pyridoxine. To collect conidia of each *A. fumigatus* strain, PDA was used. The antifungal chemicals were commercially obtained as follows: fluconazole, miconazole, itraconazole, propiconazole, bromuconazole, tebuconazole, difenoconazole, clotrimazole (Wako Pure Chemical Industries, Osaka, Japan), and amphotericin B (Sigma-Aldrich Co., St. Louis, MO, USA). Micafungin was a generous gift from Dr. Keietsu Abe, Tohoku University.

### Construction of the gene deletion and complemented strains

For the deletion of the *AoatrR* gene in *A. oryzae*, approximately 1-kb fragments upstream and downstream of the coding region of the gene were amplified by PCR using primers

YESAoAtrRFw + AoAtrRPtrARv and PtrAAoAtrRFw + AoAtrRYESRv, respectively. The selectable marker gene, *ptrA*, was isolated by digesting pPTRI (TaKaRa Bio, Otsu, Japan) with *NheI*. Then, the PCR-amplified two DNA fragments, the *ptrA* gene, and a yeast vector, pYES2 (Invitrogen, Tokyo, Japan), digested with *EcoRI* and *BamHI*, were assembled in *S. cerevisiae* BY4741 (*MATa*, *his3Δ1*, *leu2Δ0*, *met15Δ0*, *ura3Δ0*) as described previously [61,62]. The resulting plasmid DNA was digested with *KpnI* and *NotI* to prepare a deletion construct, which was used for deletion of *AoatrR*. Similarly, for the deletion of the *AnatrR* gene in *A. nidulans*, DNA fragments upstream and downstream of the coding region of the gene were PCR-amplified using primers YESAnAtrRFw + AnAtrRPtrARv and PtrAAAnAtrRFw + AnAtrRYESRv, respectively. The PCR-amplified two DNA fragments, the *ptrA* gene, and pYES2 digested with *EcoRI* and *BamHI* were assembled in *S. cerevisiae*, and used for deletion of *AnatrR*. Southern blot analyses demonstrated that the transformation cassettes had integrated homologously at the targeted loci and the target ORF was replaced with a selectable marker gene. To construct the *A. fumigatus* deletion mutants and the complemented strain, plasmids for each purpose were generated. DNA manipulation was performed according to standard laboratory procedures. To amplify DNA fragments from the genome, Prime STAR HS (TaKaRa Bio) was used. To prepare gene replacement cassettes for *A. fumigatus*, the fragments and plasmids were constructed by one-step fusion PCR and GeneArt Seamless Cloning and Assembly Kit (Invitrogen), respectively. Primers used in the present study were listed in S3 Table.

To generate a replacement cassette for *atrR* gene, the 5'- and 3'-flanking regions were obtained using the primers AtrR-5.UP and AtrR-5.LP(hph) (for the 5'-region) and AtrR-3.UP(hph) and AtrR-3.LP (for the 3'-region). These flanking regions and an hph fragment, hygromycin B resistant marker that was amplified from pCB1004 plasmid, were fused by one-step fusion PCR, which were then used for transformation.

For complementation of *atrR* gene, the *atrR* fragment containing both upstream and downstream sequences were PCR amplified using the primers AtrR-5.UPHind and AtrR-3.LP. The PCR fragment was digested by *HindIII* and *XmaI* and ligated into *HindIII*- and *HpaI*-digested pKIS518 (derived from a binary vector pPZP-HYG2, in which the *hygB* gene was removed by *BamHI* digestion, and a *ptrA* cassette is ligated at *KpnI* and *EcoRV* sites between the right and left borders of T-DNA), resulting in a plasmid pKIS518-*atrR*, which was used for *Agrobacterium tumefaciens*-mediated transformation.

To generate replacement cassettes for the *srbA*, *cyp51A*, and *cdr1B* genes, the 5'- and 3'-flanking regions were obtained using the primers *srbA*-U-F(pUC119E) and *srbA*-U-R(*ptrA*) (for the 5'-region of *srbA*) and *srbA*-D-F(*ptrA*) and *srbA*-D-R(pUC119B) (for the 3'-region of *srbA*), *cyp51A*-U-F(pBC-ph-s) and *cyp51A*-U-R(*ptrA*) (for the 5'-region of *cyp51A*) and *cyp51A*-D-F(*ptrA*) and *cyp51A*-D-R(pBC-ph-x) (for the 3'-region of *cyp51A*), and *cdr1B*-U-F(pUC119B) and *cdr1B*-U-R(*ptrA*) (for the 5'-region of *cdr1B*) and *cdr1B*-D-F(*ptrA*) and *cdr1B*-D-R(pUC119E) (for the 3'-region of *cdr1B*), respectively. These flanking regions and a *ptrA* fragment, pyrithiamine resistant marker that was amplified from pPTRI plasmid (TaKaRa Bio), were fused into pUC119 or pBC-phleo by GeneArt cloning system, resulting in plasmids pUC119-*srbA*::*ptrA*, pBC-phleo-*cyp51A*::*ptrA*, and pBC119-*cdr1B*::*ptrA*. The cassettes used for transformation were amplified from these plasmids.

For generation of a plasmid pBC-phleo-PthiA::cyp51A, promoter fragment (approximately 800bp) of *A. fumigatus thiA* (Afu6g08360) and the *cyp51A* ORF and terminator (approximately 450bp) fragment were obtained using primers PthiA-F(pBC-ph-s) and PthiA-R(*cyp51A*) (for the PthiA) and RT-*cyp51A*-F and *cyp51A*+T-R(pBC-ph-x) (for the *cyp51A* ORF+ter), respectively. These fragments were fused into pBC-phleo by GeneArt cloning system, resulting in a plasmid pBC-phleo-PthiA::cyp51A, which was used for transformation to obtain strains, Af293+PthiA-*cyp51A*, Δ*atrR*+PthiA-*cyp51A*, and Δ*srbA*+PthiA-*cyp51A*.

*A. fumigatus* transformation was performed according to a protoplast-polyethylene glycol transformation method for *Aspergillus* [63]. Precise recombination and integration were confirmed by Southern Blot analysis and/or PCR of the genomic DNA, and in case of gene deletion the absence of mRNA of the target gene was confirmatively verified using real-time RT-PCR analysis. To generate a complemented strain for the *atrR* gene, *A. tumefaciens* strain EHA105 carrying the pKIS518-*atrR* was used for transformation of *A. fumigatus*  $\Delta$ *atrR* strain by the method described elsewhere [64].

### Antifungal drugs susceptibility test

Paper-disc diffusion assay: The conidia of each strain of interest were mixed with 20 mL of GMM (final concentration,  $10^4$  conidia/mL), and they were pored into a petri dish to solidify. A paper-disc was placed on center of the plate, and 10  $\mu$ L of drug solution was dropped on it (fluconazole: 10 mg/mL; miconazole: 10 mg/mL; amphotericin B: 0.25 mg/mL; micafungin: 0.02 mg/mL). The plates were incubated at 37°C for 48 h before photographed. Instead of mixing conidia with pre-solidified GMM, the strains were inoculated by streaking conidia on a GMM plate when multiple strains were investigated.

Colony growth inhibition test: The  $10^4$  conidia of each strain were inoculated on the center of GMM plates containing 0 to 5  $\mu$ g/mL of itraconazole or miconazole. The plates were incubated at 37°C for 70 h. The colony diameter was measured from three independent plates, and the mean values for plates with drugs were compared with those without drugs.

MIC test: MICs of each strain against antifungal drugs were investigated as described previously [65]. Tests were performed in triplicates using micafungin, amphotericin B, flucytosine, fluconazole, itraconazole, voriconazole, miconazole, and posaconazole in RPMI 1640 medium (pH 7.0) at 35°C. This was performed according to the Clinical and Laboratory Standards Institute reference broth microdilution method, document M38-A2, with partial modifications in term of using the dried plate for antifungal susceptibility testing of yeasts method (Eiken Chemicals, Tokyo, Japan).

### RNA and cDNA preparation

The mycelia were cultured in GMM, YGMM, or PDB at 37°C and harvested at time-points (18–24 h) appropriate for the applications. The mycelia were frozen in liquid nitrogen, and total RNA was isolated using the FastRNA Pro Red Kit (MP Biomedicals, Santa Ana, CA, USA). To obtain cDNA pools from the total RNA, reverse transcription was performed using the ReverTra Ace qPCR RT Master Mix with gDNA remover (Toyobo, Osaka, Japan).

### Quantitative real-time RT-PCR

Real-time RT-PCR was performed using SYBR Green detection as described previously [63]. The Thunderbird SYBR qPCR Mix was used for reaction mixture preparation (Toyobo). The primer sets are listed in S3 Table. The relative expression ratios were calculated by the comparative cycle threshold (Ct) ( $\Delta\Delta$ Ct) method. The actin gene was used as a normalization reference (internal control). Each sample was tested in triplicate.

### RNA-sequencing analysis

RNA-sequencing analysis was performed as described previously [66]. Briefly, mRNA libraries and cDNA libraries were prepared by Illumina TruSeq RNA Sample Prep Kit v2 according to the standard protocols (Illumina, San Diego, CA, USA). Each total RNA sample (1  $\mu$ g) was enriched for mRNA using oligo (dT)-tagged beads. The library construction involved cDNA



synthesis, end repair, A-tailing, adapter ligation, and amplification. The mean length for each library was approximately 280 to 300 bp. Sequencing was performed in a pair-end 50 base mode on a Miseq system (Illumina). In this study, we performed two independent experimental settings: one containing Af293,  $\Delta atrR$ , and  $\Delta srbA$  (total 3 samples) and the other containing Af293 and  $\Delta atrR$  with DMSO, fluconazole, or miconazole treatment (total 6 samples). These read data were deposited to the DDBJ Sequence Read Archive under accession No. PRJDB5273.

To compare expression levels for each gene, the sequences were analyzed using CLC genomics workbench (CLC Bio, Aarhus, Denmark). The sequence reads were trimmed on the program software. The only reads with quality values higher than Q30 were used for mapping. The *A. fumigatus* Af293 genome data retrieved from NCBI (<http://www.ncbi.nlm.nih.gov/bioproject/PRJNA14003>) was used as the template for mapping. From the mapping data, RPKM values were calculated. Heat map presentation was performed using Cluster 3.0 and Java TreeView ver 1.1.6r2 according to the instructions.

### Growth under hypoxia condition

The conidia of each strain were inoculated on GMM plate, and the plate was incubated at 37°C in anaeropack system (Mitsubishi Gas Chemical, Tokyo, Japan) where initial concentration of oxygen was set at 2% (hypoxia condition). After 96 h, oxygen in the pack appeared to be completely consumed as estimated from no more growth of all colonies on the plate. The plate for normoxia was incubated at 37°C in a regular incubator without gas control (21% oxygen) for 72 h.

### Murine model of pulmonary aspergillosis

The mouse model of pulmonary aspergillosis was performed according to [67] with slight modifications. *A. fumigatus* strains Af293,  $\Delta atrR$ , and  $Co-atrR$  were used to infect immunosuppressed mice (12 mice per group). Outbred male ICR mice (5w, body weight, 20 to 24 g) were housed in sterile cages with sterile bedding and provided with sterile feed and drinking water containing 300 µg/mL tetracycline hydrochloride to prevent bacterial infection. Mice were immunosuppressed with cyclophosphamide at a concentration of 200 mg per kg of body weight, which was administered intraperitoneally on days -4, -2, 1, 3, 5, and 7 prior to and post-infection (day 0). The *A. fumigatus* conidia used for inoculation were grown on PDA for 5 days prior to infection. Fresh conidia were harvested in PBS+0.01% Tween 20 and filtered through a Falcon Cell Strainer (Corning Inc., NY, USA). Conidial suspensions were spun for 5 min at 3,000 × g, washed twice with PBS+0.01% Tween 20, counted using a hemocytometer, then resuspended at a concentration of 10<sup>6</sup> conidia/µl. Mice were anesthetized by ketamine and xylazine and infected by intratracheal instillation of 2.5 × 10<sup>7</sup> conidia in 25 µl of PBS. Mice were weighed and visually inspected every 24 h from the day of infection. The endpoint for survival experimentation was identified when a 30% reduction in body weight was recorded, at which time the mice were sacrificed. The statistical significance of comparative survival values was calculated using log rank analysis using the Prism statistical analysis package.

For *A. fumigatus* strains Afs35,  $\Delta atrR$ ,  $\Delta srbA$ , and  $\Delta atrR \Delta srbA$ , immunosuppressed ICR mice (5w, body weight, 20 to 24 g) were used as described above (9 to 11 mice per group). Mice were immunosuppressed with cyclophosphamide at a concentration of 150 mg per kg of body weight, which was administered intraperitoneally on days -4, -1, 3, 6, 9, and 12 prior to and post-infection (day 0). Cortisone acetate (Sigma-Aldrich Co) was also administered subcutaneously at a concentration of 200 mg per kg of body weight on day -1. Mice were anesthetized by ketamine and xylazine and infected by intratracheal instillation of 3 × 10<sup>5</sup> conidia in

30  $\mu$ l of PBS. Mice were weighed and visually inspected every 24 h from the day of infection. The endpoint for survival experimentation was identified when a 30% reduction in body weight was recorded, at which time the mice were sacrificed.

## Chromatin immunoprecipitation

For ChIP experiments, a strain possessing 3x HA-tagged allele of *atrR* was constructed. A cassette consisting of 750 bp of the C-terminus of *atrR* fused to a 3x HA tag, a *trpC* terminator followed by a hygromycin resistance gene and 750 bp of the 3' untranslated region of the *atrR* gene was transformed into Afs35 cells with selection for hygromycin resistance. Resistant clones were confirmed to contain a homologous integration by PCR (Designated SPF89 strain).  $1 \times 10^6$  spores/mL of *A. fumigatus* strains Afs35 (*atrR*) and SPF89 (*atrR*-3xHA) were grown in 50 mL of Sabouroud dextrose medium in 250 mL shaking flask cultures for 16 h. Cross-linking was done in (0.4 M Sucrose, 10 mM Tris-HCl, pH 8.0, 1 mM EDTA, adding 1 mM PMSF and 1% formaldehyde just before use) for 15 min under shaking (100 rpm) at 30°C. Crosslinking was stopped by adding 2.5 mL of 2 M glycine, and continued shaking incubation for 10 min. Mycelia were collected and dried using vacuum filtration and rinsed with sterile ddH<sub>2</sub>O and frozen immediately with liquid nitrogen and stored at -80°C. Approximately 100 mg of frozen mycelia were ground to a fine powder in a chilled mortar and pestle with liquid nitrogen added. Powder was transferred to 0.5 mL of ChIP lysis buffer (CLB: 50 mM HEPES pH 7.5, 150 mM NaCl, 1 mM EDTA, 1% Triton X-100, 0.1% Deoxycholate (Sigma D6750), 0.1% SDS, 1 mM PMSF, 1x fungal proteinase inhibitor cocktail (Sigma)). Each sample was vortexed for 2 min and then split into 3\* 130  $\mu$ l volume in AFA Fiber Pre-Slit Snap-Cap [6 x 15mm] microTUBE [Covaris] (130 $\mu$ l sample per tube). Chromatin was sheared with E220 Focused-ultrasonicator [Covaris] under following conditions: Peak Incident Power (W): 175; Duty Factor: 10%; Cycles per burst: 200; Treatment Time: 420 sec; Temperature: 7°C; Sample volume: 130  $\mu$ l; in the presence of E220 -Intensifier (pn500141). Tubes from each sample were then pooled and centrifuged at 10,000 g for 5 min at 4°C. Supernatant was transferred into new tube. 25  $\mu$ L was reserved as input control (IC) fraction for reverse crosslinking to verify sonication and control for ChIP and qPCR.

The sheared chromatin was incubated with HA.11(16B12) mouse monoclonal antibody (Covance) at 1:150 dilution overnight (12 h) on a nutator at 4°C. This sample was further incubated with 30  $\mu$ L of washed Protein G Dynabeads (Life Technologies) for another 12 h. Washing, reverse-crosslinking and purification of ChIP-ed DNA was performed as described in Chung et al. [30].

## ChIP qRT-PCR

Semiquantitative PCR was initially performed across the *cyp51A* and *cdr1B* promoters to serve as initial verification of enrichment of these promoter regions upon ChIP with HA. This PCR was done using Phusion DNA polymerase (NEB) under following conditions: 95°C for 30 s followed by 25 cycles of 95°C for 15 s, 60°C for 10 s and 72°C for 10 s. The primers used for the reaction were *cyp51A*-ChIP-F1 and *cyp51A*-ChIP-R1, *cyp51A*-ChIP-F2 and *cyp51A*-ChIP-R2, and *cyp51A*-ChIP-F3 and *cyp51A*-ChIP-R3 (for the *cyp51A* promoter (-69 to -415, -395 to -697, and -677 to -995, respectively)), *cdr1B*-ChIP-F1 and *cdr1B*-ChIP-R1, *cdr1B*-ChIP-F2 and *cdr1B*-ChIP-R2, and *cdr1B*-ChIP-F3 and *cdr1B*-ChIP-R3 (for the *cdr1B* promoter (-75 to -393, -376 to -691, and -675 to -982, respectively)), and *act1*-ChIP-F and *act1*-ChIP-R (for the *act1* promoter (-134 to -454)) (S3 Table). Real-time PCR was performed in triplicate for each separate ChIP experiment using primers designed for regions as identified above as enriched in preliminary analysis, under the following conditions: 1 cycle of 95°C for

30 s followed by 40 cycles of 95°C for 15 s and 60°C for 30 s on an MyiQ2 BioRad machine. 1 µl of ChIP-ed or input (diluted 25-fold to bring it to 1%) DNA was used in 20 µl total volume reaction using SYBR green master mix (BioRad) and 0.4 µM of each primer. Percent input method was used to calculate the signal of enrichment of the promoter region for each gene (<http://www.thermofisher.com/us/en/home/life-science/epigenetics-noncoding-rna-research/chromatin-remodeling/chromatin-immunoprecipitation-chip/chip-analysis.html>).

## Supporting Information

**S1 Fig. Characters of AtrR-family protein.** (A) Amino acid sequence alignment for Zn-finger motifs. Amino acid sequences of the candidate *A. oryzae* proteins (TF1 to TF5) were compared with that of *S. cerevisiae* Zn-finger type transcription factors, Pdr1 and Pdr3. The sequence numbers of amino acid in each protein were shown in brackets. (B) Protein motifs in the AtrR proteins. The Gal4-like Zn<sub>2</sub>-Cys<sub>6</sub> DNA binding motif (IPR001138) is indicated by the diagonal line-containing box. The fungal specific sequence motif associated with transcription factor (IPR007219) is indicated by a dotted box. The number above the boxes show the amino acid sequence numbers counted from an initial methionine. (PPTX)

**S2 Fig. Construction of *AoatrR* and *AnatrR* gene deletion strains.** (A) Genomic structures of the *AoatrR* loci in *A. oryzae* LigD and  $\Delta$ *AoatrR*. The *AoatrR* gene was replaced with a *ptrA* marker in the deletion strain. *SphI* restriction sites are indicated. The fragment used as a probe is indicated by the black bar. (B) Southern blot analysis to confirm deletion of the *AoatrR* gene. The expected sizes of the bands detected by probing were 5.7 kb and 3.4 kb in WT and  $\Delta$ *AoatrR* strain, respectively. (C) Genomic structures of *AnatrR* loci in *A. nidulans* KU70 and  $\Delta$ *AnatrR*. The *AnatrR* gene was replaced with a *ptrA* marker in the deletion strain. *SalI* restriction sites are indicated. The fragment used as a probe is indicated by the black bar. (D) Southern blot analysis to confirm deletion of the *AoatrR* gene. The expected sizes of the bands detected by probing were 11.3 kb and 2.8 kb in WT and  $\Delta$ *AnatrR* strains, respectively. (PPTX)

**S3 Fig. Construction of *atrR* gene deletion in *A. fumigatus*.** (A) Genomic structures of the *atrR* loci in Af293 and  $\Delta$ *atrR*. The *atrR* gene was replaced with an *hph* marker (1.35kb) in the mutant strain. *NspV* restriction sites are indicated by the blue arrowheads. The fragment used as a probe is indicated as a purple line. (B) Southern blot analysis for checking deletion of *atrR* gene. The expected size of the bands detected by probing were 3.9 kb and 3.6 kb in the WT and  $\Delta$ *atrR* strains, respectively. (PPTX)

**S4 Fig. Drug susceptibility test by paper-disc diffusion assay for the azole fungicides.** GMM plates containing conidia of each strain were prepared. A paper-disc was placed on center of the plate, and 10 µl of drug solution indicated was dropped on it (bromuconazole: 10 mg/mL; tebuconazole: 10 mg/mL; difenoconazole: 10 mg/mL; propiconazole: 10 mg/mL). The plates were incubated for 48 h before photographed. (PPTX)

**S5 Fig. Characterization of 3x HA-tagged allele of *atrR*.** (A) Western blot analysis of AtrR containing a 3x HA tag at its C-terminus. Whole cell protein extracts were prepared from wild-type and *atrR*-3x HA-containing cells. Equal amounts of protein were resolved by SDS-PAGE and then stained with Ponceau S (top panel) to confirm equal loading. This membrane was then subjected to western blotting using an anti-HA mouse monoclonal antibody.

The ~100 kDa AtrR-3x HA is only detected in extracts from cells containing the epitope-tagged allele. (B) Azole sensitivity test for the strain containing 3x HA-tagged allele of *atrR*. Spores from the indicated strains were placed on either minimal medium or the same medium containing 0.15 µg/ml voriconazole. Plates were incubated at 37°C for 72 hours and then photographed. Note that the strain containing the epitope-tagged *atrR* allele grows at least as well as the wild-type cells confirming that this allele retains function.

(PPTX)

**S1 Table. AtrR-dependent genes.**

(XLSX)

**S2 Table. SrbA-dependent genes.**

(XLSX)

**S3 Table. List of primers used in this study.**

(XLSX)

## Acknowledgments

We acknowledge experimental assistance of Dr. Misako Ohkusu and Ms. Yumiko Nakano.

## Author Contributions

**Conceived and designed the experiments:** DH KS WSMR KG.

**Performed the experiments:** DH DM KS SP AO AW.

**Analyzed the data:** DH DM KS AW WSMR KG.

**Contributed reagents/materials/analysis tools:** TG AW KK TS SK.

**Wrote the paper:** DH KS WSMR KG.

## References

1. Vermeulen E, Lagrou K, Verweij PE. Azole resistance in *Aspergillus fumigatus*: a growing public health concern. *Curr Opin Infect Dis* [Internet]. 2013; 26(6):493–500.
2. van der Linden JWM, Arendrup MC, Warris A, Lagrou K, Pelloux H, Hauser PM, et al. Prospective multi-center international surveillance of azole resistance in *Aspergillus fumigatus*. *Emerg Infect Dis*. Centers for Disease Control and Prevention (CDC); 2015; 21(6):1041–4.
3. Howard SJ, Cerar D, Anderson MJ, Albarrag A, Fisher MC, Pasqualotto AC, et al. Frequency and evolution of azole resistance in *Aspergillus fumigatus* associated with treatment failure. *Emerg Infect Dis*. 2009; 15(7):1068–76. doi: [10.3201/eid1507.090043](https://doi.org/10.3201/eid1507.090043) PMID: [19624922](https://pubmed.ncbi.nlm.nih.gov/19624922/)
4. Ghannoum MA, Rice LB. Antifungal agents: Mode of action, mechanisms of resistance, and correlation of these mechanisms with bacterial resistance. Vol. 12, *Clinical Microbiology Reviews*. 1999. p. 501–17.
5. Alcazar-Fuoli L, Mellado E, Garcia-Effron G, Lopez JF, Grimalt JO, Cuenca-Estrella JM, et al. Ergosterol biosynthesis pathway in *Aspergillus fumigatus*. *Steroids*. 2008; 73(3):339–47. doi: [10.1016/j.steroids.2007.11.005](https://doi.org/10.1016/j.steroids.2007.11.005) PMID: [18191972](https://pubmed.ncbi.nlm.nih.gov/18191972/)
6. Lelièvre L, Groh M, Angebault C, Maherault AC, Didier E, Bournoux ME. Azole resistant *Aspergillus fumigatus*: An emerging problem. Vol. 43, *Medecine et Maladies Infectieuses*. 2013. p. 139–45.
7. Tashiro M, Izumikawa K, Hirano K, Ide S, Mihara T, Hosogaya N, et al. Correlation between triazole treatment history and susceptibility in clinically isolated *Aspergillus fumigatus*. *Antimicrob Agents Chemother*. 2012; 56(9):4870–5. doi: [10.1128/AAC.00514-12](https://doi.org/10.1128/AAC.00514-12) PMID: [22751542](https://pubmed.ncbi.nlm.nih.gov/22751542/)
8. Camps SM, van der Linden JW, Li Y, Kuijper EJ, van Dissel JT, Verweij PE, et al. Rapid induction of multiple resistance mechanisms in *Aspergillus fumigatus* during azole therapy: a case study and review of the literature. *Antimicrob Agents Chemother* [Internet]. 2012; 56(1):10–6.

9. Verweij PE, Chowdhary A, Melchers WJG, Meis JF. Azole Resistance in *Aspergillus fumigatus*: Can We Retain the Clinical Use of Mold-Active Antifungal Azoles? Weinstein RA, editor. *Clin Infect Dis* [Internet]. 2016; 62(3):362–8.
10. Vermeulen E, Maertens J, Schoemans H, Lagrou K. Azole-resistant *Aspergillus fumigatus* due to TR46/Y121F/T289A mutation emerging in Belgium, July 2012. *Eurosurveillance*. 2012; 17(48).
11. Snelders E, Van Der Lee HAL, Kuijpers J, Rijs AJMM, Varga J, Samson RA, et al. Emergence of azole resistance in *Aspergillus fumigatus* and spread of a single resistance mechanism. *PLoS Med*. 2008; 5(11):1629–37.
12. Pelaez T, Monteiro MC, Garcia-Rubio R, Bouza E, Gomez-Lopez A, Mellado E. First detection of *Aspergillus fumigatus* azole-resistant strain due to Cyp51A TR46/Y121F/T289A in an azole-naive patient in Spain. *New microbes new Infect* [Internet]. 2015; 6:33–4.
13. Mellado E, Garcia-Effron G, Alcázar-Fuoli L, Melchers WJG, Verweij PE, Cuenca-Estrella M, et al. A new *Aspergillus fumigatus* resistance mechanism conferring in vitro cross-resistance to azole antifungals involves a combination of cyp51A alterations. *Antimicrob Agents Chemother*. 2007; 51(6):1897–904. doi: [10.1128/AAC.01092-06](https://doi.org/10.1128/AAC.01092-06) PMID: [17371828](https://pubmed.ncbi.nlm.nih.gov/17371828/)
14. Chowdhary A, Sharma C, Kathuria S, Hagen F, Meis JF. Azole-resistant *aspergillus fumigatus* with the environmental TR46/Y121F/T289A mutation in India. Vol. 69, *Journal of Antimicrobial Chemotherapy*. 2014. p. 555–7.
15. Wu CJ, Wang HC, Lee JC, Lo HJ, Dai CT, Chou PH, et al. Azole-resistant *Aspergillus fumigatus* isolates carrying TR34/L98H mutations in Taiwan. *Mycoses*. Blackwell Publishing Ltd; 2015; 58(9):544–9.
16. Hagiwara D, Takahashi H, Fujimoto M, Sugahara M, Misawa Y, Gonoi T, et al. Multi-azole resistant *Aspergillus fumigatus* harboring Cyp51A TR46/Y121F/T289A isolated in Japan. *J Infect Chemother*. 2015;
17. Wiederhold NP, Gil VG, Gutierrez F, Lindner JR, Albataineh MT, McCarthy DI, et al. First Detection of TR34 L98H and TR46 Y121F T289A Cyp51 Mutations in *Aspergillus fumigatus* Isolates in the United States. Warnock DW, editor. *J Clin Microbiol* [Internet]. 2016; 54(1):168–71.
18. van Ingen J, van der Lee HA, Rijs TAJ, Zoll J, Leenstra T, Melchers WJG, et al. Azole, polyene and echinocandin MIC distributions for wild-type, TR34/L98H and TR46/Y121F/T289A *Aspergillus fumigatus* isolates in the Netherlands. *J Antimicrob Chemother*. 2015; 70(1):178–81. doi: [10.1093/jac/dku364](https://doi.org/10.1093/jac/dku364) PMID: [25301884](https://pubmed.ncbi.nlm.nih.gov/25301884/)
19. Camps SMT, Dutilh BE, Arendrup MC, Rijs AJMM, Snelders E, Huynen MA, et al. Discovery of a hapE Mutation That Causes Azole Resistance in *Aspergillus fumigatus* through Whole Genome Sequencing and Sexual Crossing. *PLoS One*. 2012; 7(11).
20. Fraczek MG, Bromley M, Buied A, Moore CB, Rajendran R, Rautemaa R, et al. The cdr1B efflux transporter is associated with non-cyp51a-mediated itraconazole resistance in *Aspergillus fumigatus*. *J Antimicrob Chemother*. 2013; 68(7):1486–96. doi: [10.1093/jac/dkt075](https://doi.org/10.1093/jac/dkt075) PMID: [23580559](https://pubmed.ncbi.nlm.nih.gov/23580559/)
21. Buied A, Moore CB, Denning DW, Bowyer P. High-level expression of cyp51B in azole-resistant clinical *aspergillus fumigatus* isolates. *J Antimicrob Chemother*. 2013; 68(3):512–4. doi: [10.1093/jac/dks451](https://doi.org/10.1093/jac/dks451) PMID: [23208831](https://pubmed.ncbi.nlm.nih.gov/23208831/)
22. Paul S, Diekema D, Moyer-Rowley WS. Contributions of *Aspergillus fumigatus* ATP-binding cassette transporter proteins to drug resistance and virulence. *Eukaryot Cell*. 2013; 12(12):1619–28. doi: [10.1128/EC.00171-13](https://doi.org/10.1128/EC.00171-13) PMID: [24123268](https://pubmed.ncbi.nlm.nih.gov/24123268/)
23. Delaveau T, Delahodde A, Carvajal E, Subik J, Jacq C. PDR3, a new yeast regulatory gene, is homologous to PDR1 and controls the multidrug resistance phenomenon. *Mol Gen Genet* [Internet]. 1994; 244(5):501–11.
24. Moyer-Rowley WS. Transcriptional Control of Multidrug Resistance in the Yeast *Saccharomyces*. *Prog Nucleic Acid Res Mol Biol*. 2003; 73:251–79. PMID: [12882520](https://pubmed.ncbi.nlm.nih.gov/12882520/)
25. Jungwirth H, Kuchler K. Yeast ABC transporters—A tale of sex, stress, drugs and aging. Vol. 580, *FEBS Letters*. 2006. p. 1131–8.
26. Brown MS, Goldstein JL. The SREBP pathway: Regulation of cholesterol metabolism by proteolysis of a membrane-bound transcription factor. Vol. 89, *Cell*. 1997. p. 331–40.
27. Willger SD, Puttikamonkul S, Kim K-H, Burritt JB, Grahl N, Metzler LJ, et al. A sterol-regulatory element binding protein is required for cell polarity, hypoxia adaptation, azole drug resistance, and virulence in *Aspergillus fumigatus*. *PLoS Pathog* [Internet]. 2008; 4(11):e1000200.
28. Blatzer M, Barker BM, Willger SD, Beckmann N, Blosser SJ, Cornish EJ, et al. SREBP coordinates iron and ergosterol homeostasis to mediate triazole drug and hypoxia responses in the human fungal pathogen *Aspergillus fumigatus*. *PLoS Genet*. 2011; 7(12).



29. Blosser SJ, Cramer RA. SREBP-dependent triazole susceptibility in *Aspergillus fumigatus* is mediated through direct transcriptional regulation of *erg11A* (*cyp51A*). *Antimicrob Agents Chemother*. 2012; 56(1):248–57. doi: [10.1128/AAC.05027-11](https://doi.org/10.1128/AAC.05027-11) PMID: [22006005](https://pubmed.ncbi.nlm.nih.gov/22006005/)
30. Chung D, Barker BM, Carey CC, Merriman B, Werner ER, Lechner BE, et al. ChIP-seq and In Vivo Transcriptome Analyses of the *Aspergillus fumigatus* SREBP SrbA Reveals a New Regulator of the Fungal Hypoxia Response and Virulence. *PLoS Pathog*. Public Library of Science; 2014; 10(11).
31. Chang YC, Bien CM, Lee H, Espenshade PJ, Kwon-Chung KJ. Sre1p, a regulator of oxygen sensing and sterol homeostasis, is required for virulence in *Cryptococcus neoformans*. *Mol Microbiol*. 2007; 64(3):614–29. PMID: [17462012](https://pubmed.ncbi.nlm.nih.gov/17462012/)
32. Chun CD, Liu OW, Madhani HD. A link between virulence and homeostatic responses to hypoxia during infection by the human fungal pathogen *Cryptococcus neoformans*. *PLoS Pathog*. 2007; 3(2):0225–38.
33. Hatamoto O, Urimitsu G, Machida M, Sano M, Tanaka A, Oka C, Maeda H, Tainaka H, Ito T, Uchikawa T, Masuda T, Matsushima K (2010) Recombinant vector capable of increasing secretion of Koji mold protease. US patent, US 7842799
34. Paul S, Moye-Rowley WS. Multidrug resistance in fungi: Regulation of transporter-encoding gene expression. Vol. 5 APR, *Frontiers in Physiology*. Frontiers Media SA; 2014.
35. Abou Ammar G, Tryono R, Döll K, Karlovsky P, Deising HB, Wirsal SGR. Identification of ABC transporter genes of *Fusarium graminearum* with roles in azole tolerance and/or virulence. *PLoS One* [Internet]. Public Library of Science; 2013 Jan 11 [cited 2016 Apr 21]; 8(11):e79042.
36. Hayashi K, Schoonbeek H, De Waard MA. Expression of the ABC transporter BcatrD from *Botrytis cinerea* reduces sensitivity to sterol demethylation inhibitor fungicides. *Pestic Biochem Physiol* [Internet]. 2002 Jun [cited 2016 Apr 21]; 73(2):110–21.
37. Hulvey J, Popko JT, Sang H, Berg A, Jung G. Overexpression of ShCYP51B and ShatrD in *Sclerotinia homoeocarpa* isolates exhibiting practical field resistance to a demethylation inhibitor fungicide. *Appl Environ Microbiol* [Internet]. 2012 Sep 15 [cited 2016 Apr 21]; 78(18):6674–82.
38. Hagiwara D, Watanabe A, Kamei K, Goldman GH. Epidemiological and Genomic Landscape of Azole Resistance Mechanisms in *Aspergillus* Fungi. *Front Microbiol* [Internet]. 2016 [cited 2016 Oct 25]; 7:1382.
39. Slaven JW, Anderson MJ, Sanglard D, Dixon GK, Bille J, Roberts IS, et al. Increased expression of a novel *Aspergillus fumigatus* ABC transporter gene, *atrF*, in the presence of itraconazole in an itraconazole resistant clinical isolate. *Fungal Genet Biol*. 2002; 36(3):199–206. PMID: [12135575](https://pubmed.ncbi.nlm.nih.gov/12135575/)
40. Meneau I, Coste AT, Sanglard D. Identification of *Aspergillus fumigatus* multidrug transporter genes and their potential involvement in antifungal resistance. *Med Mycol* [Internet]. 2016 Mar 1 [cited 2016 Mar 11];
41. Zhang Y, Zhang Z, Zhang X, Zhang H, Sun X, Hu C, et al. CDR4 is the major contributor to azole resistance among four Pdr5p-like ABC transporters in *Neurospora crassa*. *Fungal Biol*. 2012; 116(7):848–54. doi: [10.1016/j.funbio.2012.05.002](https://doi.org/10.1016/j.funbio.2012.05.002) PMID: [22749171](https://pubmed.ncbi.nlm.nih.gov/22749171/)
42. Sun X, Wang K, Yu X, Liu J, Zhang H, Zhou F, et al. Transcription factor CCG-8 as a new regulator in the adaptation to antifungal azole stress. *Antimicrob Agents Chemother*. 2014; 58(3):1434–42. doi: [10.1128/AAC.02244-13](https://doi.org/10.1128/AAC.02244-13) PMID: [24342650](https://pubmed.ncbi.nlm.nih.gov/24342650/)
43. Wang K, Zhang Z, Chen X, Sun X, Jin C, Liu H, et al. Transcription factor ADS-4 regulates adaptive responses and resistance to antifungal azole stress. *Antimicrob Agents Chemother* [Internet]. 2015 Sep [cited 2016 Apr 21]; 59(9):5396–404.
44. Paul S, Schmidt JA, Moye-Rowley WS. Regulation of the CgPdr1 transcription factor from the pathogen *Candida glabrata*. *Eukaryot Cell* [Internet]. 2011 Feb [cited 2016 Apr 21]; 10(2):187–97.
45. Ferrari S, Ischer F, Calabrese D, Posteraro B, Sanguinetti M, Fadda G, et al. Gain of function mutations in CgPDR1 of *Candida glabrata* not only mediate antifungal resistance but also enhance virulence. *PLoS Pathog* [Internet]. 2009 Jan [cited 2016 Apr 21]; 5(1):e1000268.
46. Vermitsky J-P, Edlind TD. Azole resistance in *Candida glabrata*: coordinate upregulation of multidrug transporters and evidence for a Pdr1-like transcription factor. *Antimicrob Agents Chemother* [Internet]. 2004 Oct [cited 2016 Apr 21]; 48(10):3773–81.
47. Vermitsky J-P, Earhart KD, Smith WL, Homayouni R, Edlind TD, Rogers PD. Pdr1 regulates multidrug resistance in *Candida glabrata*: gene disruption and genome-wide expression studies. *Mol Microbiol*. 2006; 61(3):704–22. PMID: [16803598](https://pubmed.ncbi.nlm.nih.gov/16803598/)
48. Willger SD, Cornish EJ, Chung D, Fleming BA, Lehmann MM, Puttikamonkul S, et al. Dsc orthologs are required for hypoxia adaptation, triazole drug responses, and fungal virulence in *Aspergillus fumigatus*. *Eukaryot Cell*. 2012; 11(12):1557–67. doi: [10.1128/EC.00252-12](https://doi.org/10.1128/EC.00252-12) PMID: [23104569](https://pubmed.ncbi.nlm.nih.gov/23104569/)
49. Dhingra S, Kowlaski CH, Thammahong A, Beattie SR, Bultman KM, Cramer RA. RbdB, a Rhomboid Protease Critical for SREBP Activation and Virulence in *Aspergillus fumigatus*. Bahn Y-S, editor.

- mSphere [Internet]. American Society for Microbiology Journals; 2016 Mar 2 [cited 2016 Apr 21]; 1(2): e00035–16.
50. Vaknin Y, Hillmann F, Iannitti R, Ben Baruch N, Sandovsky-Losica H, Shadkchan Y, et al. Identification and characterization of a novel *Aspergillus fumigatus* rhomboid family putative protease RbdA involved in hypoxia sensing and virulence. *Infect Immun* [Internet]. 2016 Apr 11 [cited 2016 Apr 16];IAI.00011–6 –.
  51. Bat-Ochir C, Kwak J-Y, Koh S-K, Jeon M-H, Chung D, Lee Y-W, et al. The signal peptide peptidase SppA is involved in sterol regulatory element-binding protein cleavage and hypoxia adaptation in *Aspergillus nidulans*. *Mol Microbiol* [Internet]. 2016 Jan 29 [cited 2016 Apr 21];
  52. MacPherson S, Larochelle M, Turcotte B. A fungal family of transcriptional regulators: the zinc cluster proteins. *Microbiol Mol Biol Rev* [Internet]. 2006; 70(3):583–604.
  53. Synnott JM, Guida A, Mulhern-Haughey S, Higgins DG, Butler G. Regulation of the hypoxic response in *Candida albicans*. *Eukaryot Cell*. 2010; 9(11):1734–46. doi: [10.1128/EC.00159-10](https://doi.org/10.1128/EC.00159-10) PMID: [20870877](https://pubmed.ncbi.nlm.nih.gov/20870877/)
  54. Barker BM, Kroll K, Vödisch M, Mazurie A, Kniemeyer O, Cramer R a. Transcriptomic and proteomic analyses of the *Aspergillus fumigatus* hypoxia response using an oxygen-controlled fermenter. *BMC Genomics* [Internet]. 2012; 13(1):62.
  55. Chung D, Haas H, Cramer R. Coordination of hypoxia adaptation and iron homeostasis in human pathogenic fungi. Vol. 3, *Frontiers in Microbiology*. 2012.
  56. Maguire SL, Wang C, Holland LM, Brunel F, Neuvéglise C, Nicaud JM, et al. Zinc Finger Transcription Factors Displaced SREBP Proteins as the Major Sterol Regulators during *Saccharomycotina* Evolution. *PLoS Genet*. 2014; 10(1).
  57. Grahl N, Puttikamonkul S, Macdonald JM, Gamcsik MP, Ngo LY, Hohl TM, et al. In vivo hypoxia and a fungal alcohol dehydrogenase influence the pathogenesis of invasive pulmonary aspergillosis. *PLoS Pathog*. 2011; 7(7).
  58. Mizutani O, Kudo Y, Saito A, Matsuura T, Inoue H, Abe K, et al. A defect of LigD (human Lig4 homolog) for nonhomologous end joining significantly improves efficiency of gene-targeting in *Aspergillus oryzae*. *Fungal Genet Biol*. 2008; 45(6):878–89. doi: [10.1016/j.fgb.2007.12.010](https://doi.org/10.1016/j.fgb.2007.12.010) PMID: [18282727](https://pubmed.ncbi.nlm.nih.gov/18282727/)
  59. Jin FJ, Takahashi T, Matsushima KI, Hara S, Shinohara Y, Maruyama JI, et al. SclR, a basic helix-loop-helix transcription factor, regulates hyphal morphology and promotes sclerotial formation in *Aspergillus oryzae*. *Eukaryot Cell*. 2011; 10(7):945–55. doi: [10.1128/EC.00013-11](https://doi.org/10.1128/EC.00013-11) PMID: [21551246](https://pubmed.ncbi.nlm.nih.gov/21551246/)
  60. Hagiwara D, Takahashi H, Watanabe A, Takahashi-Nakaguchi A, Kawamoto S, Kamei K, et al. Whole-genome comparison of *aspergillus fumigatus* strains serially isolated from patients with aspergillosis. *J Clin Microbiol*. American Society for Microbiology; 2014; 52(12):4202–9.
  61. Oldenburg KR, Vo KT, Michaelis S, Paddon C. Recombination-mediated PCR-directed plasmid construction in vivo in yeast. *Nucleic Acids Res*. 1997; 25(2):451–2. PMID: [9016579](https://pubmed.ncbi.nlm.nih.gov/9016579/)
  62. Colot H V, Park G, Turner GE, Ringelberg C, Crew CM, Litvinkova L, et al. A high-throughput gene knockout procedure for *Neurospora* reveals functions for multiple transcription factors. *Proc Natl Acad Sci U S A* [Internet]. 2006; 103(27):10352–7.
  63. Hagiwara D, Takahashi-Nakaguchi A, Toyotome T, Yoshimi A, Abe K, Kamei K, et al. NikA/TcsC histidine kinase is involved in conidiation, hyphal morphology, and responses to osmotic stress and antifungal chemicals in *Aspergillus fumigatus*. *PLoS One* [Internet]. 2013; 8(12).
  64. Shimizu K, Imanishi Y, Toh-e A, Uno J, Chibana H, Hull CM, et al. Functional characterization of PMT2, encoding a protein-O-mannosyltransferase, in the human pathogen *Cryptococcus neoformans*. *Fungal Genet Biol*. 2014; 69:13–22. doi: [10.1016/j.fgb.2014.05.007](https://doi.org/10.1016/j.fgb.2014.05.007) PMID: [24892554](https://pubmed.ncbi.nlm.nih.gov/24892554/)
  65. Kikuchi K, Watanabe A, Ito J, Oku Y, Wuren T, Taguchi H, et al. Antifungal susceptibility of *Aspergillus fumigatus* clinical isolates collected from various areas in Japan. *J Infect Chemother*. 2014; 20(5):336–8. doi: [10.1016/j.jiac.2014.01.003](https://doi.org/10.1016/j.jiac.2014.01.003) PMID: [24751235](https://pubmed.ncbi.nlm.nih.gov/24751235/)
  66. Hagiwara D, Suzuki S, Kamei K, Gonoi T, Kawamoto S. The role of AtfA and HOG MAPK pathway in stress tolerance in conidia of *Aspergillus fumigatus*. *Fungal Genet Biol*. 2014; 73:138–49. doi: [10.1016/j.fgb.2014.10.011](https://doi.org/10.1016/j.fgb.2014.10.011) PMID: [25459537](https://pubmed.ncbi.nlm.nih.gov/25459537/)
  67. Wang DN, Toyotome T, Muraosa Y, Watanabe A, Wuren T, Bunsupa S, et al. GliA in *Aspergillus fumigatus* is required for its tolerance to gliotoxin and affects the amount of extracellular and intracellular gliotoxin. *Med Mycol*. 2014; 52(5):506–18. doi: [10.1093/mmy/myu007](https://doi.org/10.1093/mmy/myu007) PMID: [24847038](https://pubmed.ncbi.nlm.nih.gov/24847038/)
